# Supplementary material for: Synthesis and In Vitro Anti-Influenza Virus Evaluation of Novel Sialic Acid (C-5 and C-9)-Pentacyclic Triterpene Derivatives
Source: MDPI journal article supplement (doi:10.3390/molecules22071018), 2017-06-22

## Supporting Information

# Synthesis and In Vitro Anti-influenza Virus Evaluation of Novel Sialic Acid (C-5 and C-9)-Pentacyclic Triterpene Derivatives

Xu Han <sup>1,†</sup>, Long-Long Si <sup>1,†</sup>, Yong-Ying Shi <sup>1</sup>, Zi-Bo Fan <sup>1</sup>, Shou-Xin Wang <sup>1,3</sup>, Zhen-Yu Tian <sup>1</sup>, Man Li <sup>1</sup>, Jia-Qi Sun <sup>1</sup>, Ping-Xuan Jiao <sup>1</sup>, Fu-Xiang Ran <sup>1</sup>, Yong-Min Zhang <sup>2</sup>, De-Min Zhou <sup>1</sup>, Su-Long Xiao <sup>1,\*</sup>

1. State Key Laboratory of Natural and Biomimetic Drugs, School of Pharmaceutical Sciences, Peking University, Beijing 100191, China; E-Mails: ax\_han@126.com (X. H.); silonglong@bjmu.edu.cn (L.-L. S.); sygne24501@sina.com (Y.-Y. S.); fancyfzb@163.com (Z.-B. F.); shouxinwang@126.com (S.-X. W.); fashankc@163.com (Z.-Y.T.), 18811711762@163.com (M.L.), jiaqi.sun@pku.edu.cn (J.-Q.S.); 15022326072@163.com (P.-X.J.); rfx@bjmu.edu.cn (F.-X. R); Deminzhou@bjmu.edu.cn (D.-M. Z)
2. Institut Parisien de Chimie Moléculaire, CNRS UMR 8232, Université Pierre & Marie Curie-Paris 6, 4 Place Jussieu, 75005 Paris, France; yongmin.zhang@upmc.fr (Y.-M. Z)
3. School of Pharmacy, Jining Medical University, Rizhao 276826, China

1. **Table S1.** The cytotoxicity of compounds **26** and **42** against HL-60, HeLa and A549 cell lines. Selected <sup>1</sup>H, <sup>13</sup>C NMR and HRMS spectra.

| NMR or HRMS                               | Page |
|-------------------------------------------|------|
| <sup>1</sup> H NMR of compound <b>9</b>   | S4   |
| <sup>13</sup> C NMR of compound <b>9</b>  | S4   |
| HRMS of compound <b>9</b>                 | S5   |
| <sup>1</sup> H NMR of compound <b>18</b>  | S5   |
| <sup>13</sup> C NMR of compound <b>18</b> | S6   |
| HRMS of compound <b>18</b>                | S6   |
| <sup>1</sup> H NMR of compound <b>19</b>  | S7   |
| <sup>13</sup> C NMR of compound <b>19</b> | S7   |
| HRMS of compound <b>19</b>                | S8   |
| <sup>1</sup> H NMR of compound <b>20</b>  | S8   |
| <sup>13</sup> C NMR of compound <b>20</b> | S9   |
| HRMS of compound <b>20</b>                | S9   |
| <sup>1</sup> H NMR of compound <b>21</b>  | S10  |
| <sup>13</sup> C NMR of compound <b>21</b> | S10  |

|                                           |     |
|-------------------------------------------|-----|
| HRMS of compound <b>21</b>                | S11 |
| <sup>1</sup> H NMR of compound <b>22</b>  | S11 |
| <sup>13</sup> C NMR of compound <b>22</b> | S12 |
| HRMS of compound <b>22</b>                | S12 |
| <sup>1</sup> H NMR of compound <b>23</b>  | S13 |
| <sup>13</sup> C NMR of compound <b>23</b> | S13 |
| HRMS of compound <b>23</b>                | S14 |
| <sup>1</sup> H NMR of compound <b>24</b>  | S14 |
| <sup>13</sup> C NMR of compound <b>24</b> | S15 |
| HRMS of compound <b>24</b>                | S15 |
| <sup>1</sup> H NMR of compound <b>25</b>  | S16 |
| <sup>13</sup> C NMR of compound <b>25</b> | S16 |
| HRMS of compound <b>25</b>                | S17 |
| <sup>1</sup> H NMR of compound <b>26</b>  | S17 |
| <sup>13</sup> C NMR of compound <b>26</b> | S18 |

|                                           |     |
|-------------------------------------------|-----|
| HRMS of compound <b>26</b>                | S18 |
| <sup>1</sup> H NMR of compound <b>28</b>  | S19 |
| <sup>13</sup> C NMR of compound <b>28</b> | S19 |
| HRMS of compound <b>28</b>                | S20 |
| <sup>1</sup> H NMR of compound <b>29</b>  | S20 |
| <sup>13</sup> C NMR of compound <b>29</b> | S21 |
| HRMS of compound <b>29</b>                | S21 |
| <sup>1</sup> H NMR of compound <b>30</b>  | S22 |
| <sup>13</sup> C NMR of compound <b>30</b> | S22 |
| HRMS of compound <b>30</b>                | S23 |
| <sup>1</sup> H NMR of compound <b>34</b>  | S23 |
| <sup>13</sup> C NMR of compound <b>34</b> | S24 |
| HRMS of compound <b>34</b>                | S24 |
| <sup>1</sup> H NMR of compound <b>35</b>  | S25 |
| <sup>13</sup> C NMR of compound <b>35</b> | S25 |
| HRMS of compound <b>35</b>                | S26 |
| <sup>1</sup> H NMR of compound <b>36</b>  | S26 |
| <sup>13</sup> C NMR of compound <b>36</b> | S27 |
| HRMS of compound <b>36</b>                | S27 |
| <sup>1</sup> H NMR of compound <b>37</b>  | S28 |
| <sup>13</sup> C NMR of compound <b>37</b> | S28 |
| HRMS of compound <b>37</b>                | S29 |
| <sup>1</sup> H NMR of compound <b>38</b>  | S29 |

|                                           |     |
|-------------------------------------------|-----|
| <sup>13</sup> C NMR of compound <b>38</b> | S30 |
| HRMS of compound <b>38</b>                | S30 |
| <sup>1</sup> H NMR of compound <b>39</b>  | S31 |
| <sup>13</sup> C NMR of compound <b>39</b> | S32 |
| HRMS of compound <b>39</b>                | S32 |
| <sup>1</sup> H NMR of compound <b>40</b>  | S33 |
| <sup>13</sup> C NMR of compound <b>40</b> | S33 |
| HRMS of compound <b>40</b>                | S34 |
| <sup>1</sup> H NMR of compound <b>41</b>  | S34 |
| <sup>13</sup> C NMR of compound <b>41</b> | S35 |
| HRMS of compound <b>41</b>                | S35 |
| <sup>1</sup> H NMR of compound <b>42</b>  | S36 |
| <sup>13</sup> C NMR of compound <b>42</b> | S36 |
| HRMS of compound <b>42</b>                | S37 |
| <sup>1</sup> H NMR of compound <b>44</b>  | S37 |
| <sup>13</sup> C NMR of compound <b>44</b> | S38 |
| HRMS of compound <b>44</b>                | S38 |
| <sup>1</sup> H NMR of compound <b>45</b>  | S39 |
| <sup>13</sup> C NMR of compound <b>45</b> | S39 |
| HRMS of compound <b>45</b>                | S40 |
| <sup>1</sup> H NMR of compound <b>46</b>  | S40 |
| <sup>13</sup> C NMR of compound <b>46</b> | S41 |
| HRMS of compound <b>46</b>                | S41 |

1. **Table S1.** The cytotoxicity of compounds **26** and **42** against HL-60, HeLa and A549 cell lines.

| Compounds | Cell lines | 0.1 $\mu$ M        | 1 $\mu$ M | 10 $\mu$ M |
|-----------|------------|--------------------|-----------|------------|
| <b>26</b> | HL-60      | 3.52               | 4.01      | 2.33       |
|           | HeLa       | -3.34              | 6.6       | 9.46       |
|           | A549       | 2.16               | 5.23      | 0.21       |
| <b>42</b> | HL-60      | -2                 | 13.6      | 53         |
|           | HeLa       | 1.18               | 20.13     | 6.04       |
|           | A549       | 2.33               | -0.37     | 17.7       |
| 5-Fu      | HL-60      | 85.22 <sup>a</sup> |           |            |
|           | HeLa       | 90.32 <sup>a</sup> |           |            |
|           | A549       | 77.20 <sup>a</sup> |           |            |

<sup>a</sup> Measured in a dose of 0.5  $\mu$ M.



3. HR-ESI-MS spectrum of compound 9

HIGH RESOLUTION MASS SPECTROMETRY REPORT

| Sample No. | Formula (M)                                                    | Ion Formula                                                      | Measured m/z | Calc m/z | Diff (ppm) |
|------------|----------------------------------------------------------------|------------------------------------------------------------------|--------------|----------|------------|
| FZB1-22    | C <sub>21</sub> H <sub>30</sub> N <sub>4</sub> O <sub>13</sub> | C <sub>21</sub> H <sub>30</sub> N <sub>4</sub> NaO <sub>13</sub> | 569.1708     | 569.1702 | -1.21      |

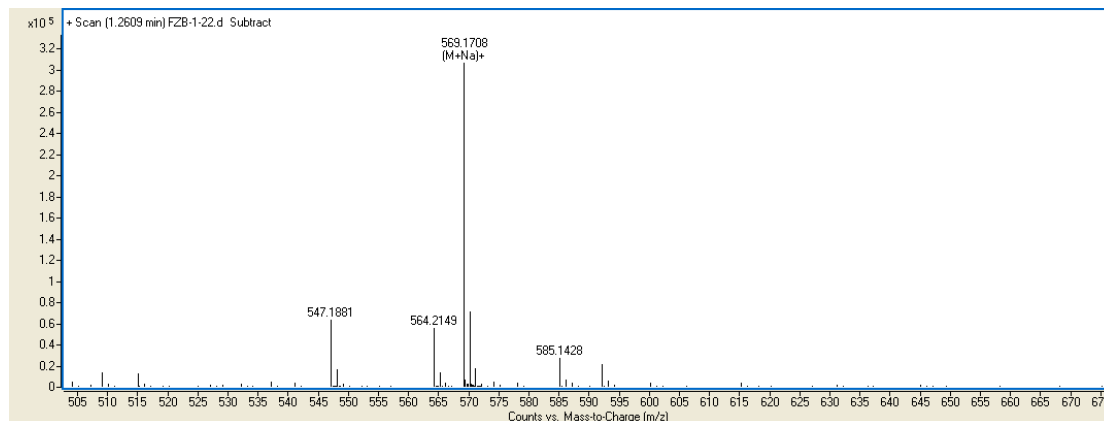

4. <sup>1</sup>H NMR (400 MHz, CDCl<sub>3</sub>) spectrum of 18

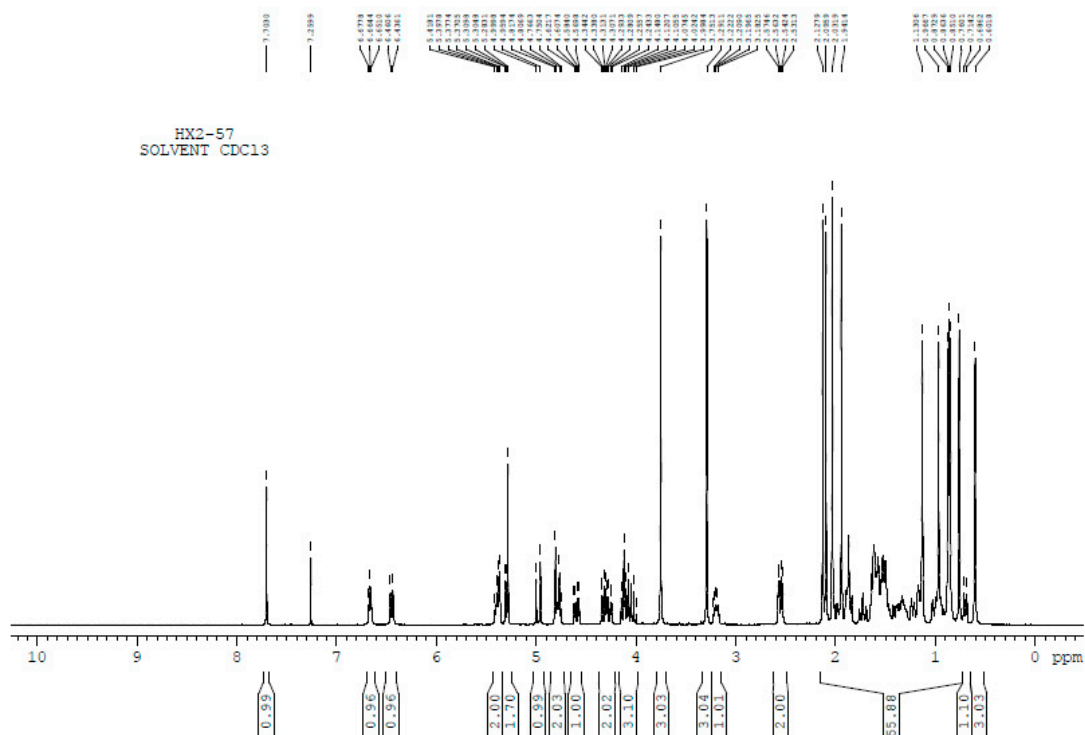

5.  $^{13}\text{C}$  NMR (100 MHz,  $\text{CDCl}_3$ ) spectrum of compound **18**

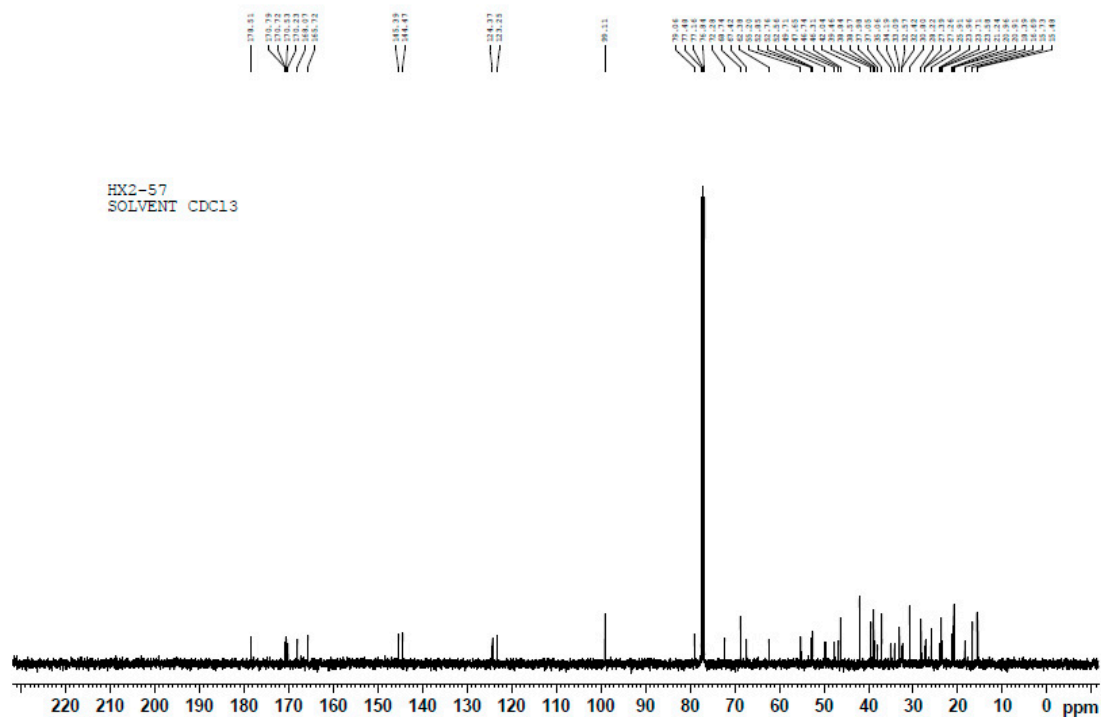

6. HR-ESI-MS spectrum of compound **18**

HIGH RESOLUTION MASS SPECTROMETRY REPORT

| Sample No. | Formula (M)                                         | Ion Formula                                         | Measured m/z | Calc m/z  | Diff (ppm) |
|------------|-----------------------------------------------------|-----------------------------------------------------|--------------|-----------|------------|
| HX2-57     | $\text{C}_{54}\text{H}_{81}\text{N}_5\text{O}_{15}$ | $\text{C}_{54}\text{H}_{82}\text{N}_5\text{O}_{15}$ | 1040.5798    | 1040.5802 | 0.37       |

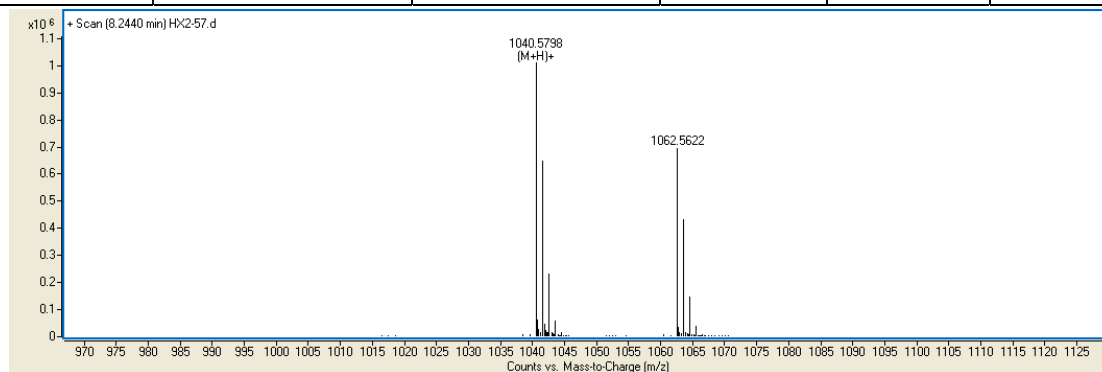

7. <sup>1</sup>H NMR (400 MHz, CD<sub>3</sub>OD) spectrum of compound 19

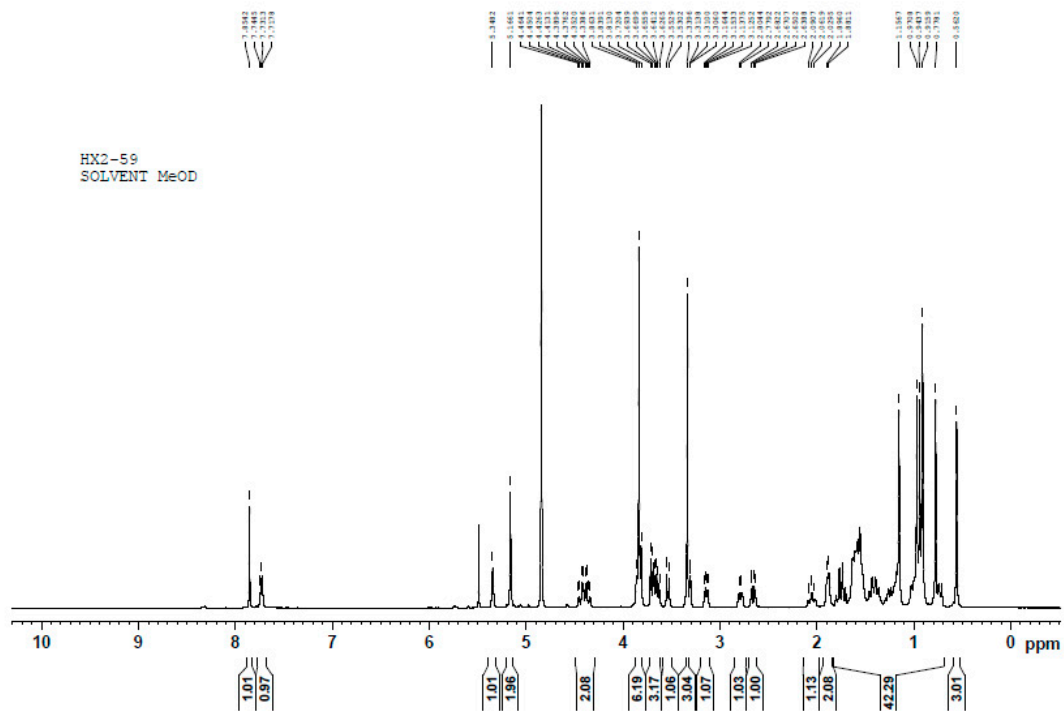

8. <sup>13</sup>C NMR (100 MHz, CD<sub>3</sub>OD) spectrum of compound 19

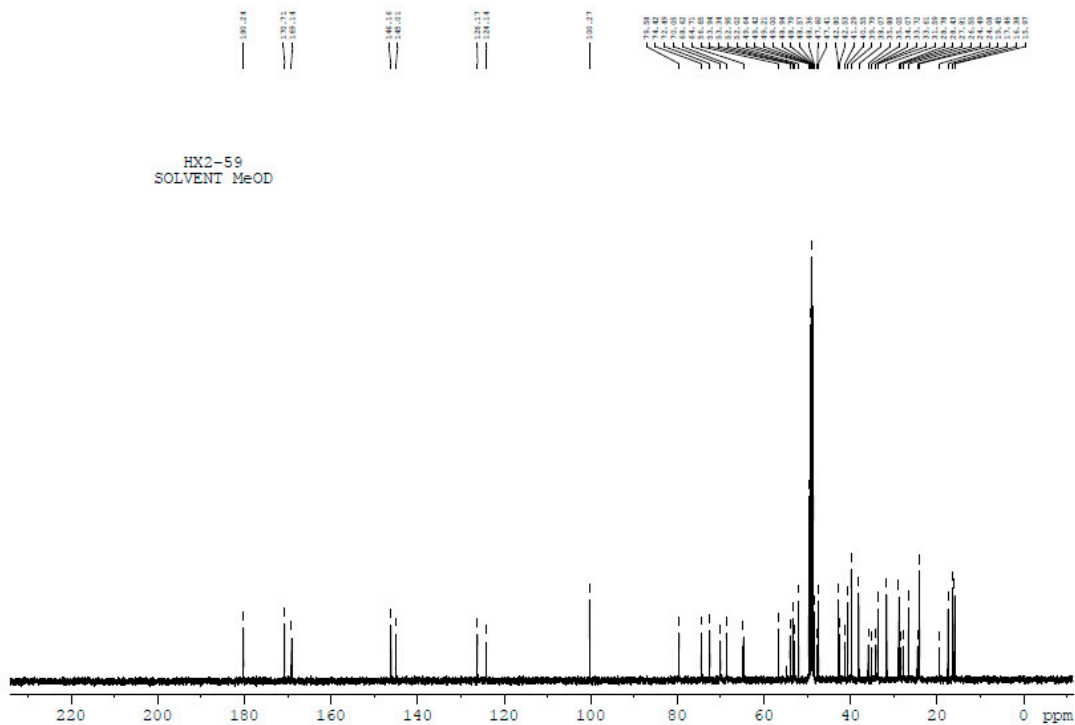

9. HR-ESI-MS spectrum of compound 19

HIGH RESOLUTION MASS SPECTROMETRY REPORT

| Sample No. | Formula (M)                                                    | Ion Formula                                                       | Measured m/z | Calc m/z | Diff (ppm) |
|------------|----------------------------------------------------------------|-------------------------------------------------------------------|--------------|----------|------------|
| HX2-59     | C <sub>46</sub> H <sub>73</sub> N <sub>5</sub> O <sub>11</sub> | C <sub>46</sub> H <sub>73</sub> N <sub>5</sub> Na O <sub>11</sub> | 894.5206     | 894.5199 | -1.23      |

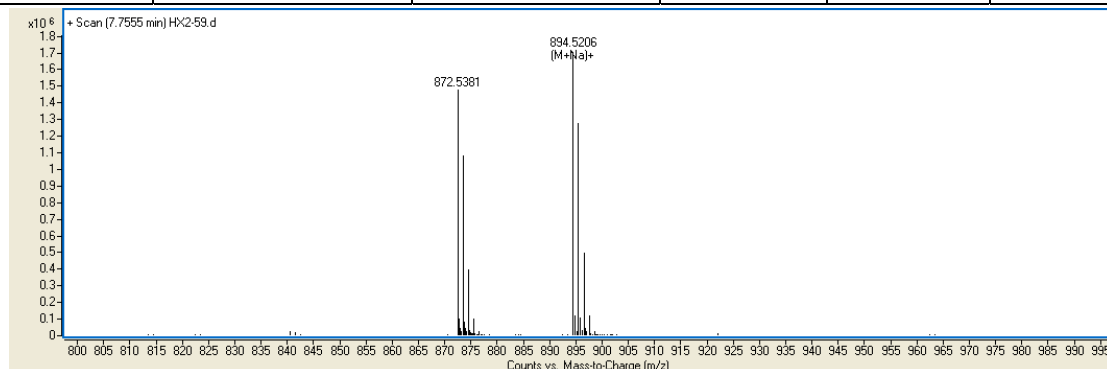

10. <sup>1</sup>H NMR (400 MHz, CDCl<sub>3</sub>) spectrum of compound 20

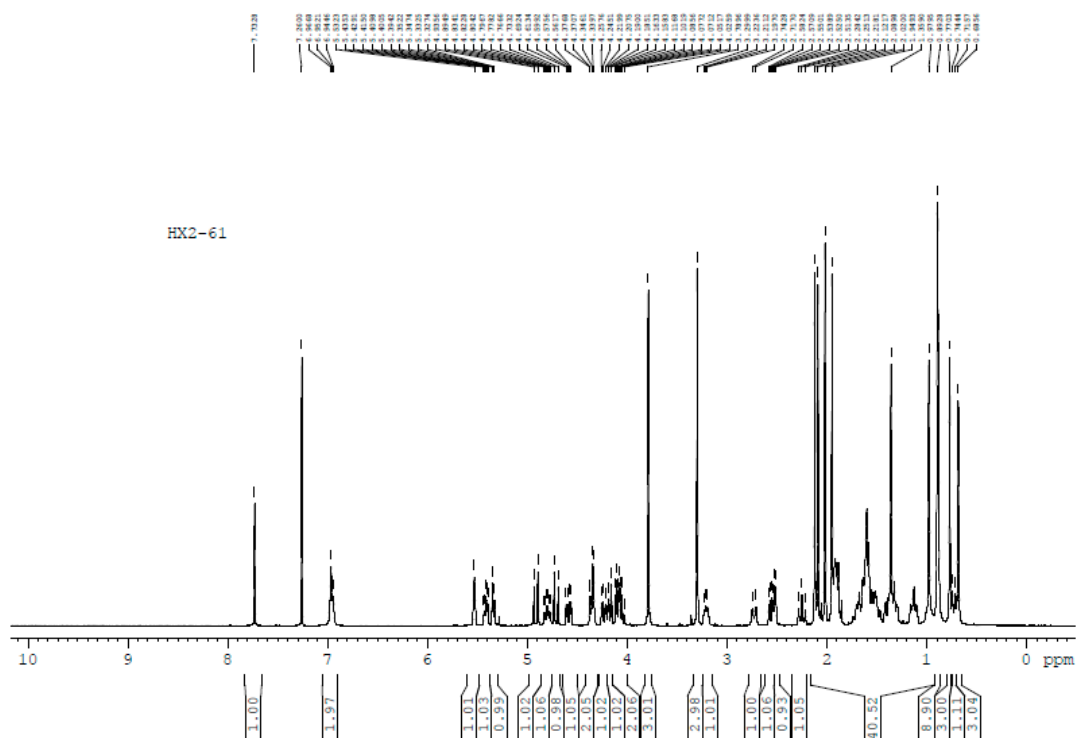



11. <sup>13</sup>C NMR (100 MHz, CDCl<sub>3</sub>) spectrum of compound 20

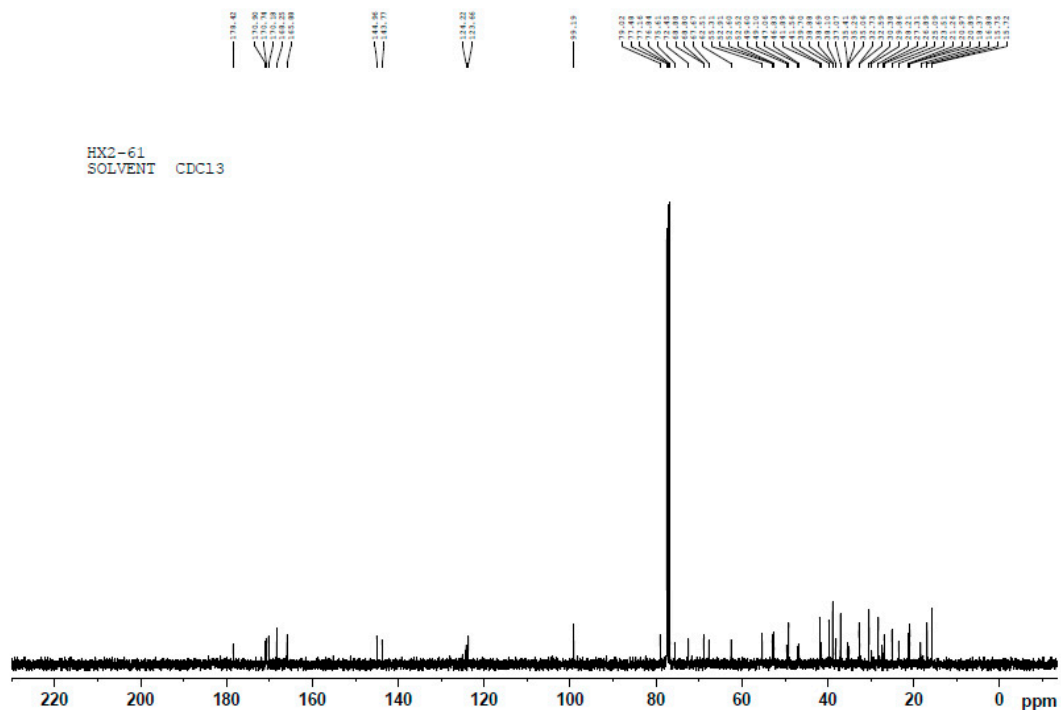

12. HR-ESI-MS spectrum of compound 20

HIGH RESOLUTION MASS SPECTROMETRY REPORT

| Sample No. | Formula (M)                                                    | Ion Formula                                                       | Measured m/z | Calc m/z  | Diff (ppm) |
|------------|----------------------------------------------------------------|-------------------------------------------------------------------|--------------|-----------|------------|
| HX2-61     | C <sub>54</sub> H <sub>81</sub> N <sub>5</sub> O <sub>16</sub> | C <sub>54</sub> H <sub>81</sub> N <sub>5</sub> Na O <sub>16</sub> | 1078.558     | 1078.5571 | -1.01      |

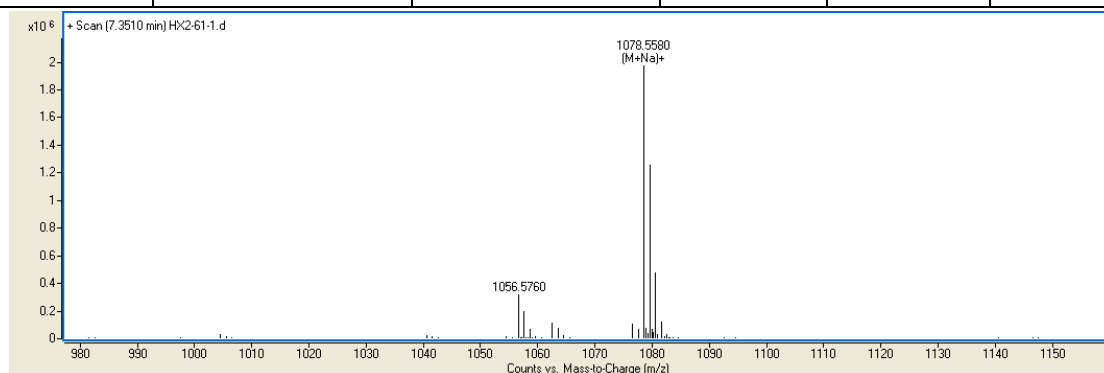

13. <sup>1</sup>H NMR (400 MHz, CD<sub>3</sub>OD) spectrum of compound 21

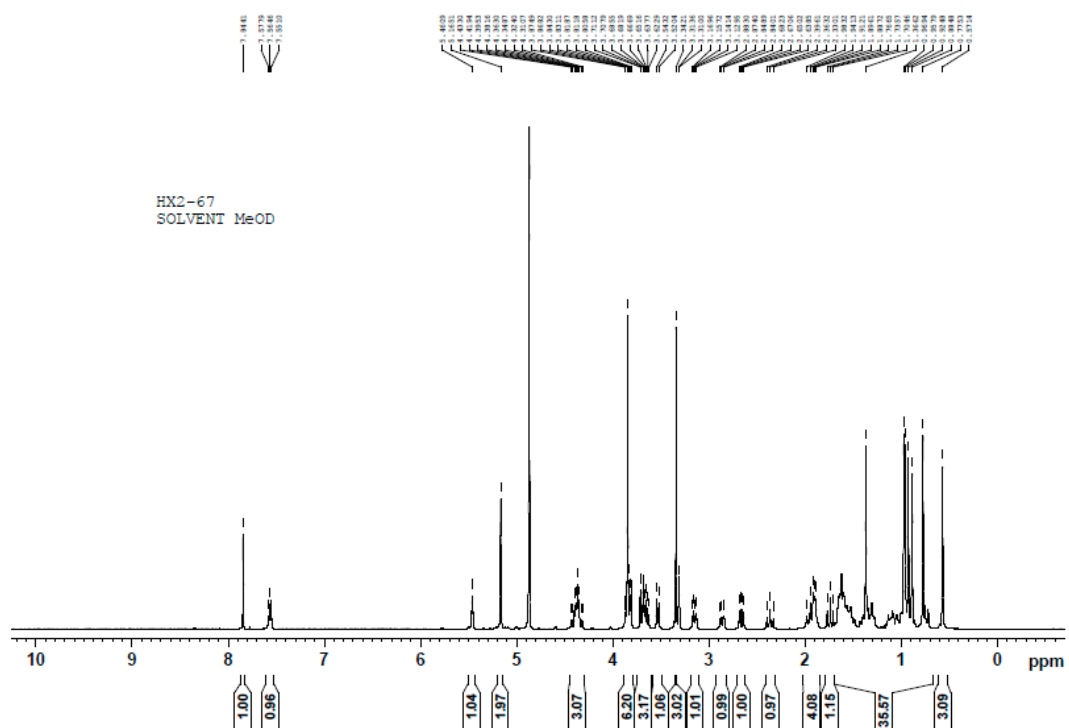

14. <sup>13</sup>C NMR (100 MHz, CD<sub>3</sub>OD) spectrum of compound 21

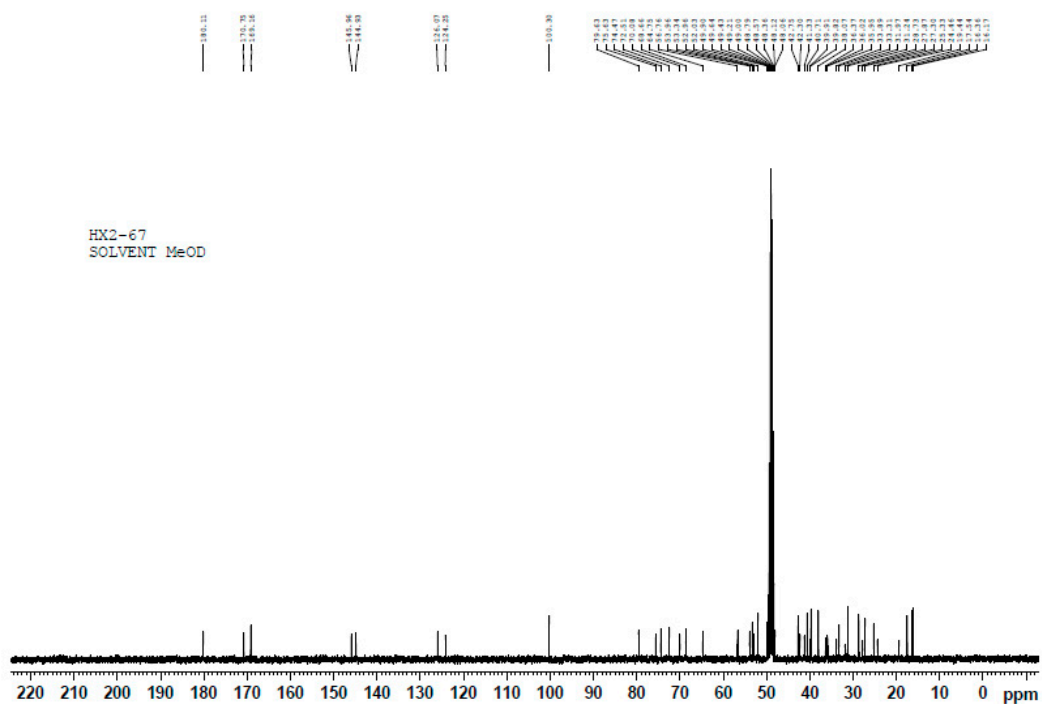

15. HR-ESI-MS spectrum of compound 21

HIGH RESOLUTION MASS SPECTROMETRY REPORT

| Sample No. | Formula (M)                                                    | Ion Formula                                                      | Measured m/z | Calc m/z | Diff (ppm) |
|------------|----------------------------------------------------------------|------------------------------------------------------------------|--------------|----------|------------|
| HX2-67     | C <sub>46</sub> H <sub>73</sub> N <sub>5</sub> O <sub>12</sub> | C <sub>46</sub> H <sub>73</sub> N <sub>5</sub> NaO <sub>12</sub> | 910.5152     | 910.5148 | -0.77      |

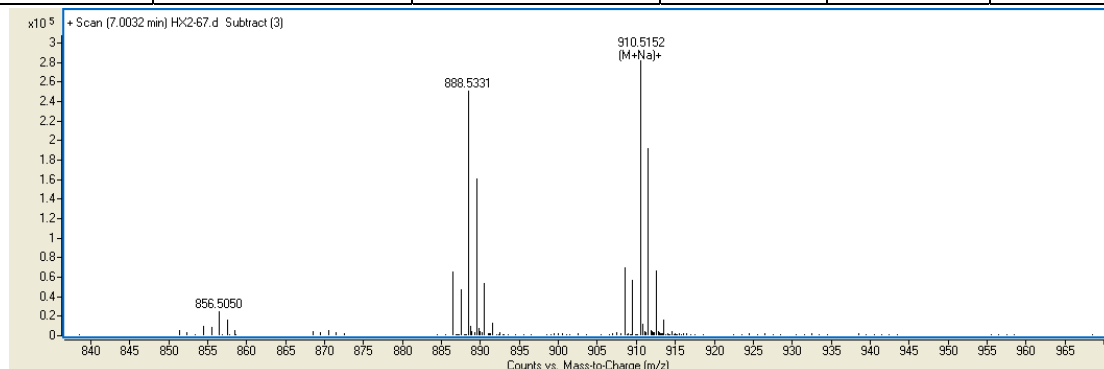

16. <sup>1</sup>H NMR (400 MHz, CDCl<sub>3</sub>) spectrum of compound 22

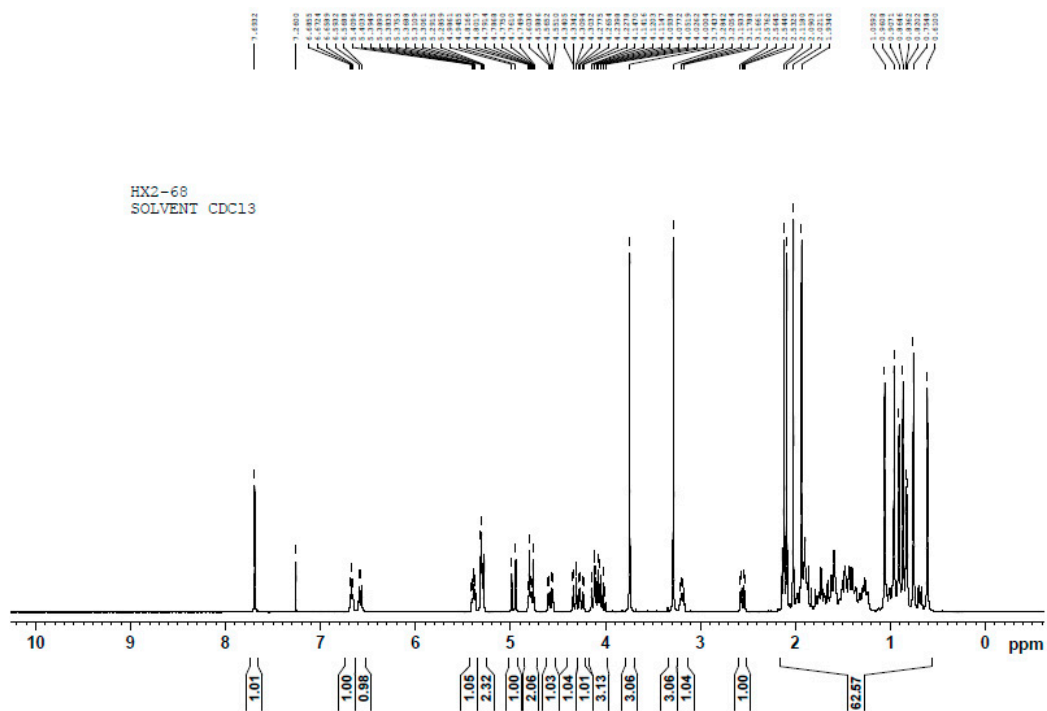

17. <sup>13</sup>C NMR (100 MHz, CDCl<sub>3</sub>) spectrum of compound **22**

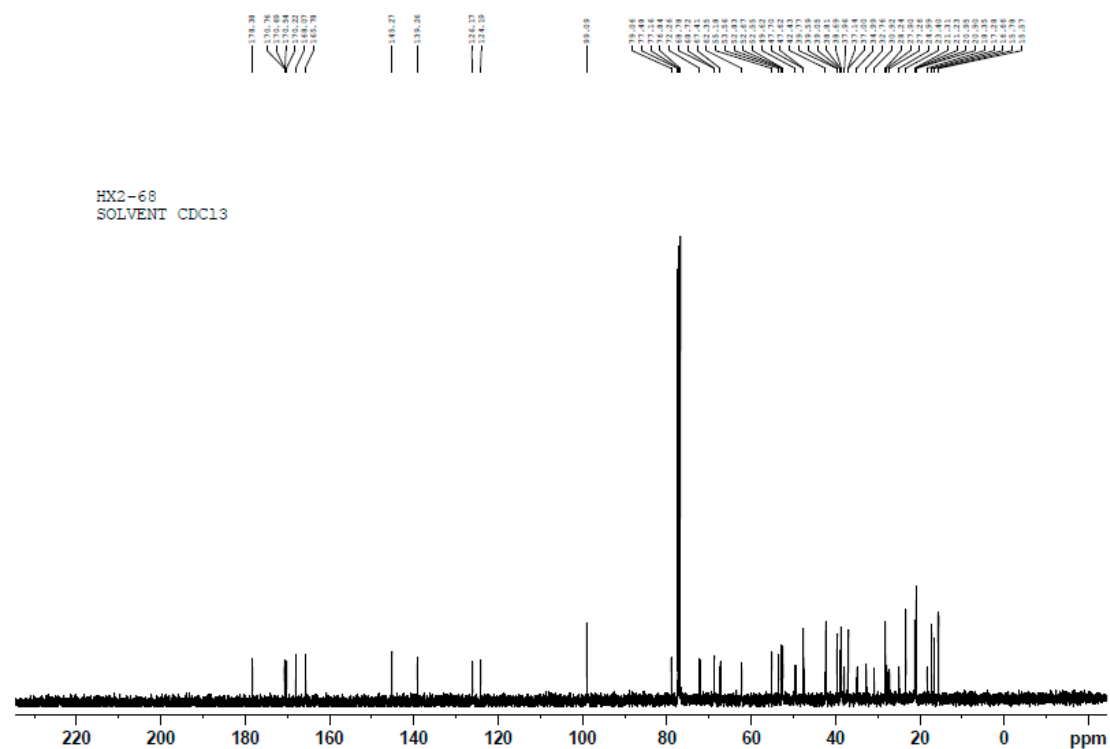

18. HR-ESI-MS spectrum of compound **22**

HIGH RESOLUTION MASS SPECTROMETRY REPORT

| Sample No. | Formula (M)                                                    | Ion Formula                                                    | Measured m/z | Calc m/z | Diff (ppm) |
|------------|----------------------------------------------------------------|----------------------------------------------------------------|--------------|----------|------------|
| HX2-68     | C <sub>54</sub> H <sub>81</sub> N <sub>5</sub> O <sub>15</sub> | C <sub>54</sub> H <sub>82</sub> N <sub>5</sub> O <sub>15</sub> | 1040.5807    | 1040.58  | -0.34      |

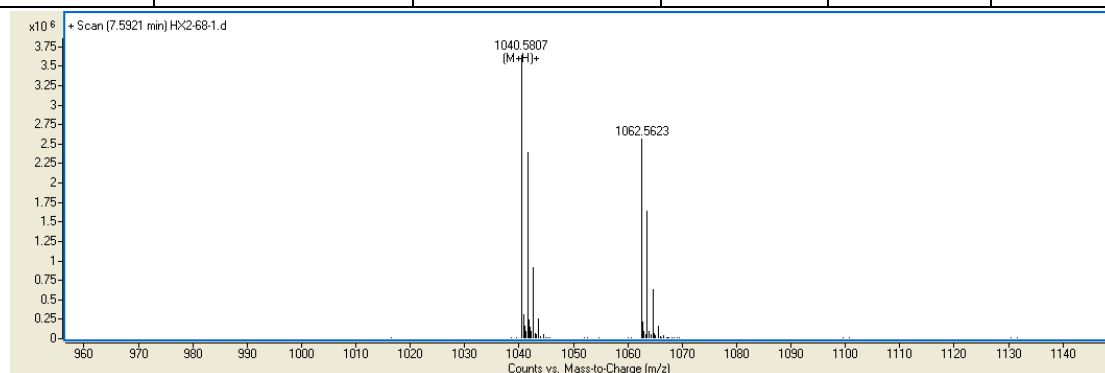

19. <sup>1</sup>H NMR (400 MHz, CD<sub>3</sub>OD) spectrum of compound 23

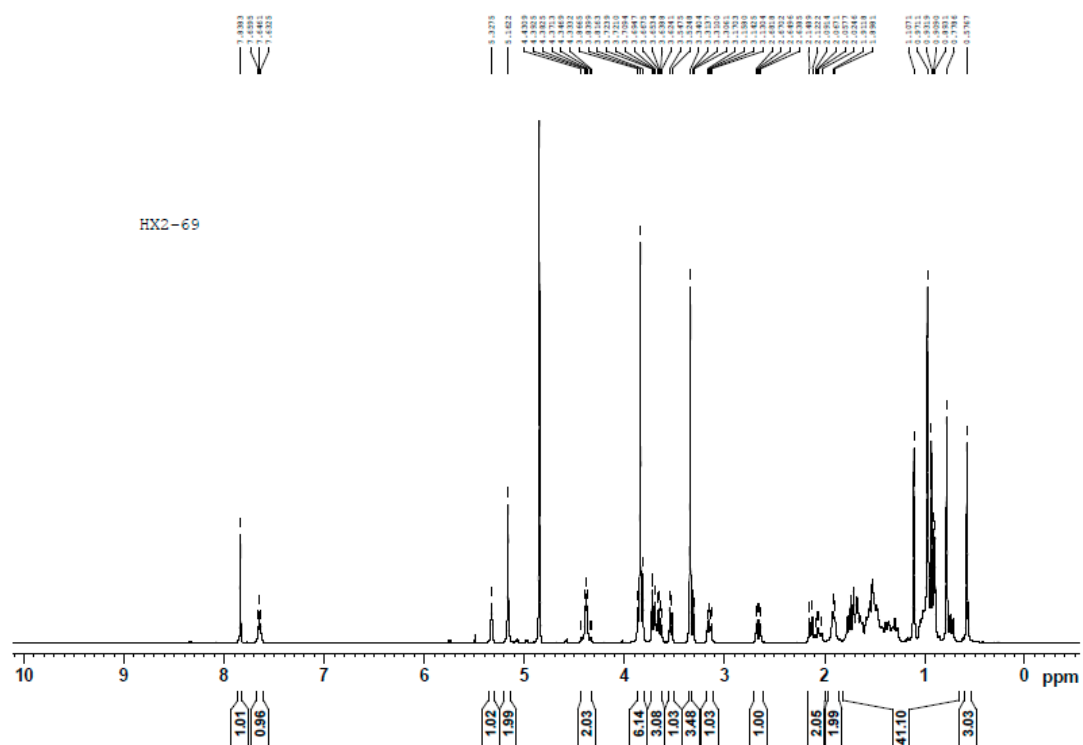

20. <sup>13</sup>C NMR (100 MHz, CD<sub>3</sub>OD) spectrum of compound 23

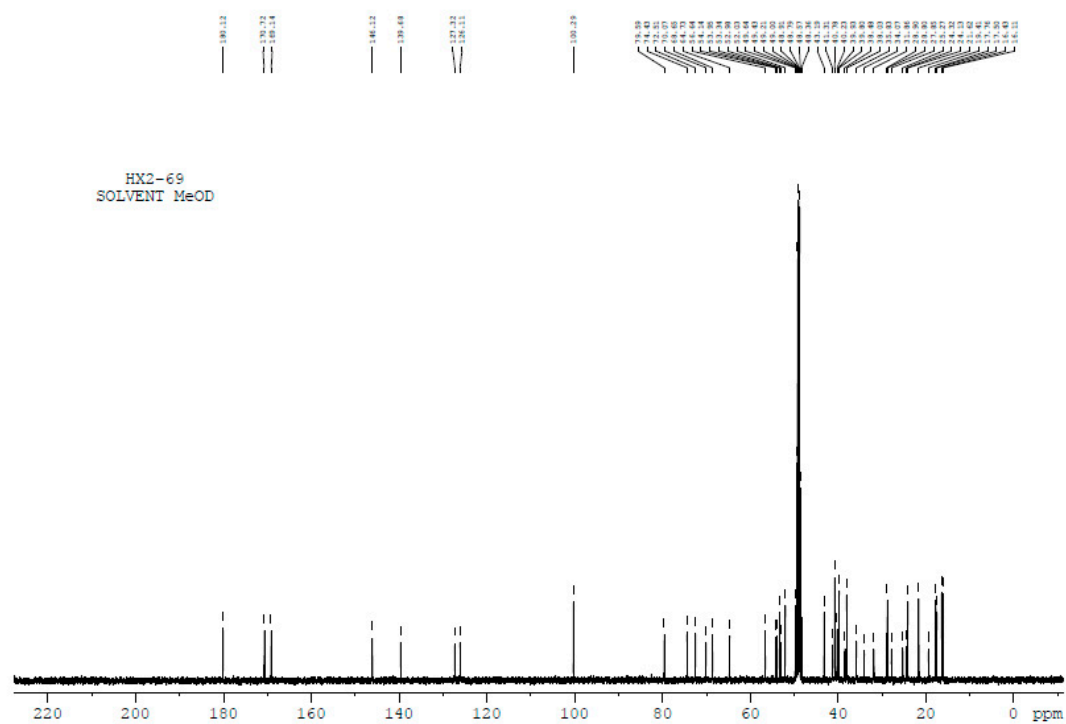

21. HR-ESI-MS spectrum of compound 23

HIGH RESOLUTION MASS SPECTROMETRY REPORT

| Sample No. | Formula (M)                                                    | Ion Formula                                                       | Measured m/z | Calc m/z | Diff (ppm) |
|------------|----------------------------------------------------------------|-------------------------------------------------------------------|--------------|----------|------------|
| HX2-69     | C <sub>46</sub> H <sub>73</sub> N <sub>5</sub> O <sub>11</sub> | C <sub>46</sub> H <sub>73</sub> N <sub>5</sub> Na O <sub>11</sub> | 894.5198     | 894.5199 | 0.03       |

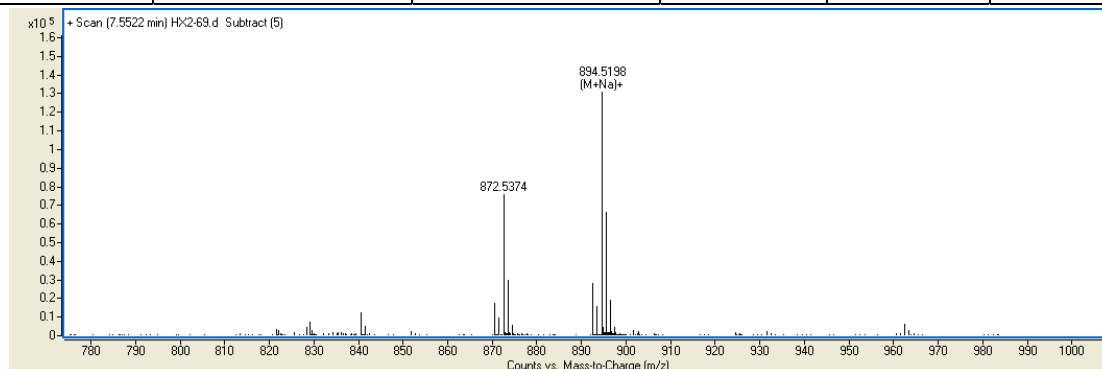

22. <sup>1</sup>H NMR (400 MHz, CD<sub>3</sub>OD) spectrum of compound 24

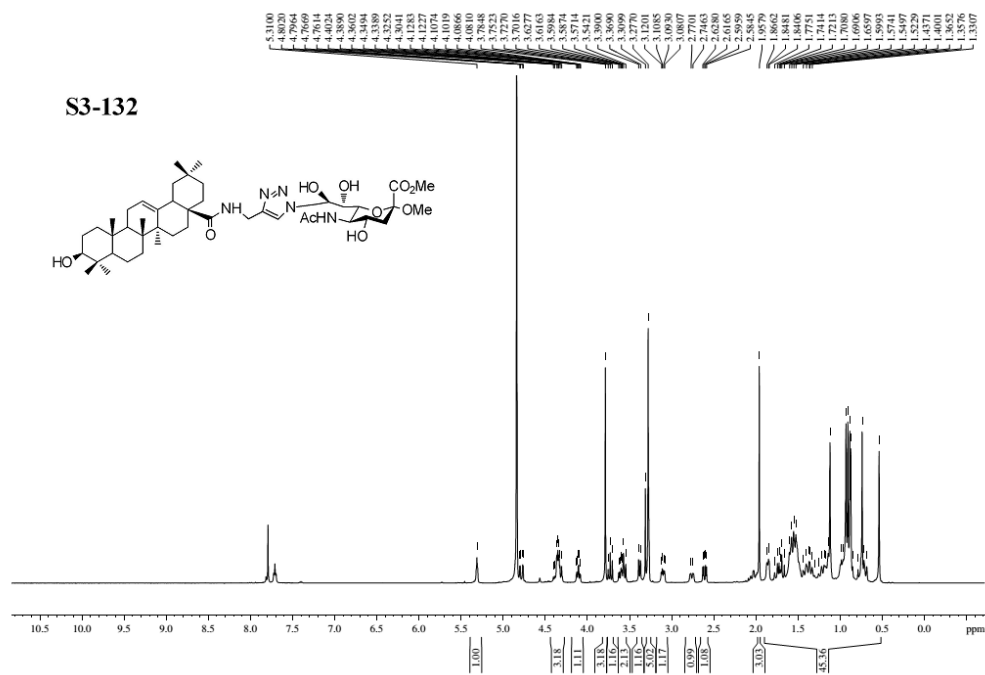

23. <sup>13</sup>C NMR (100 MHz, CD<sub>3</sub>OD) spectrum of compound 24

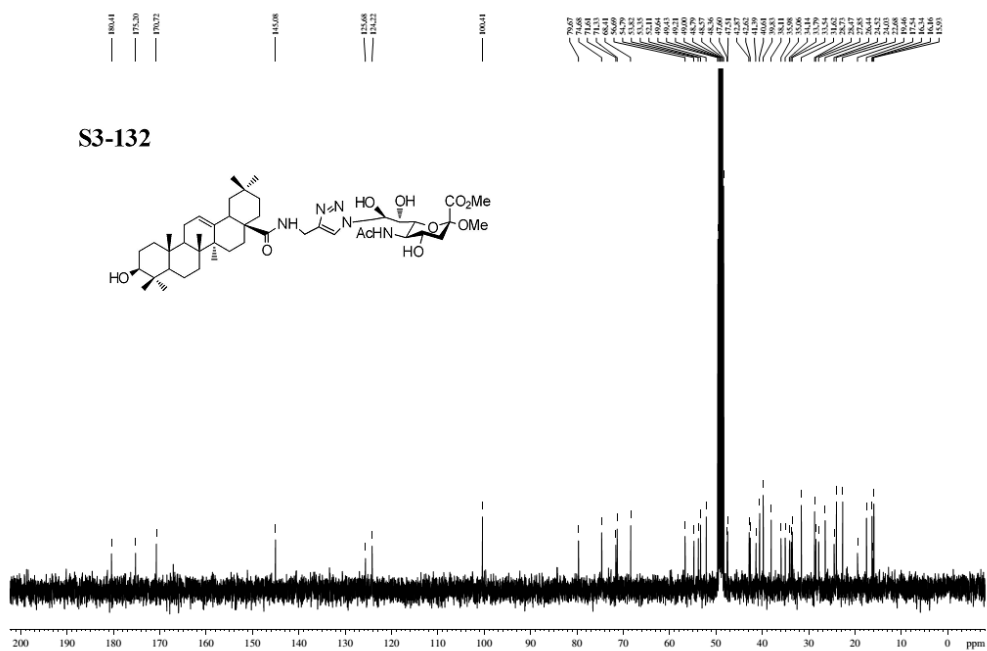

24. HR-ESI-MS spectrum of compound 24

Peking University Mass Spectrometry Sample Analysis Report

Analysis Info

Analysis Name 14040508\_20140411\_000027.d  
 Sample S3-132  
 Comment ESI Positive

Acquisition Date 4/11/2014 10:12:17 AM  
 Instrument Bruker Apex IV FTMS  
 Operator Peking University

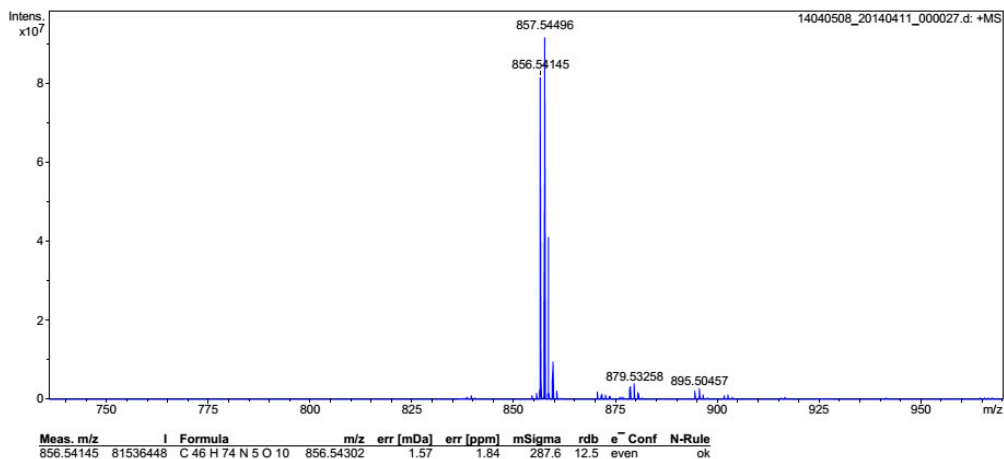





27. HR-ESI-MS spectrum of compound 25

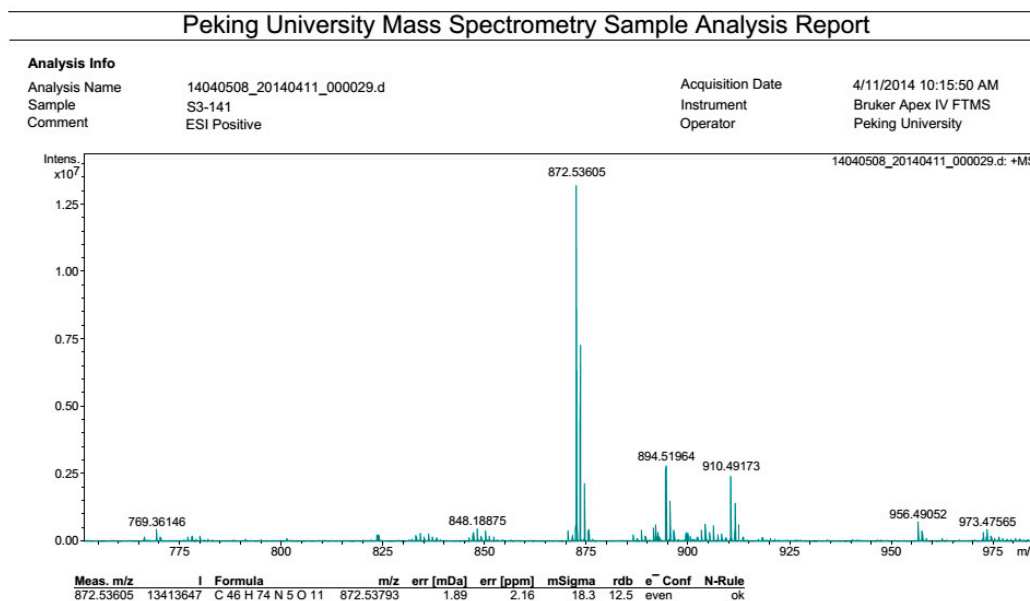

28. <sup>1</sup>H NMR (400 MHz, CD<sub>3</sub>OD) spectrum of compound 26

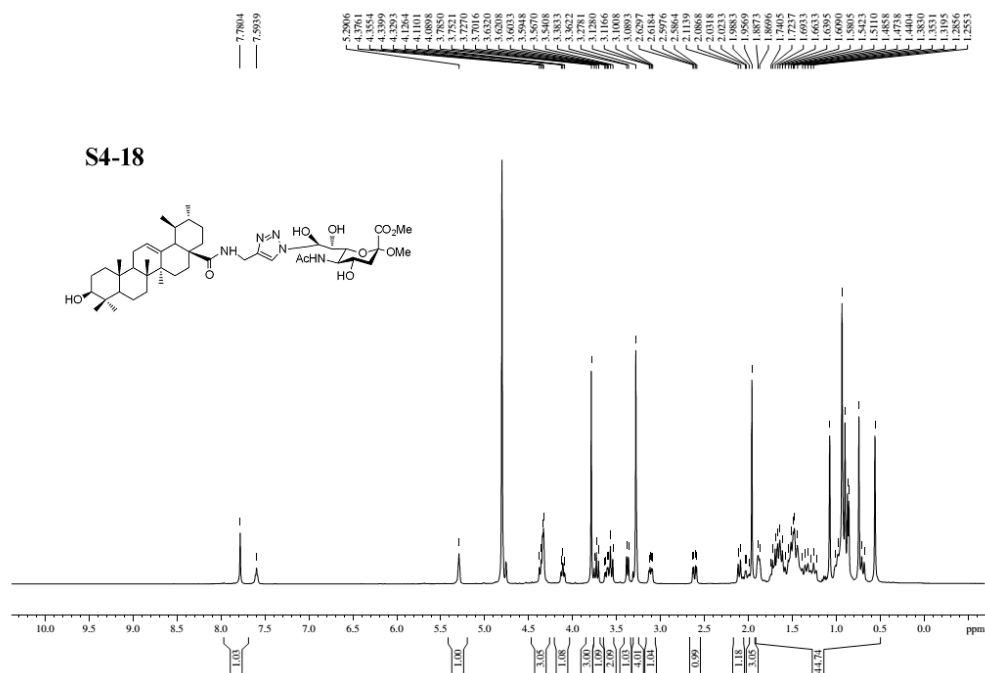

29. <sup>13</sup>C NMR (100 MHz, CD<sub>3</sub>OD) spectrum of compound 26

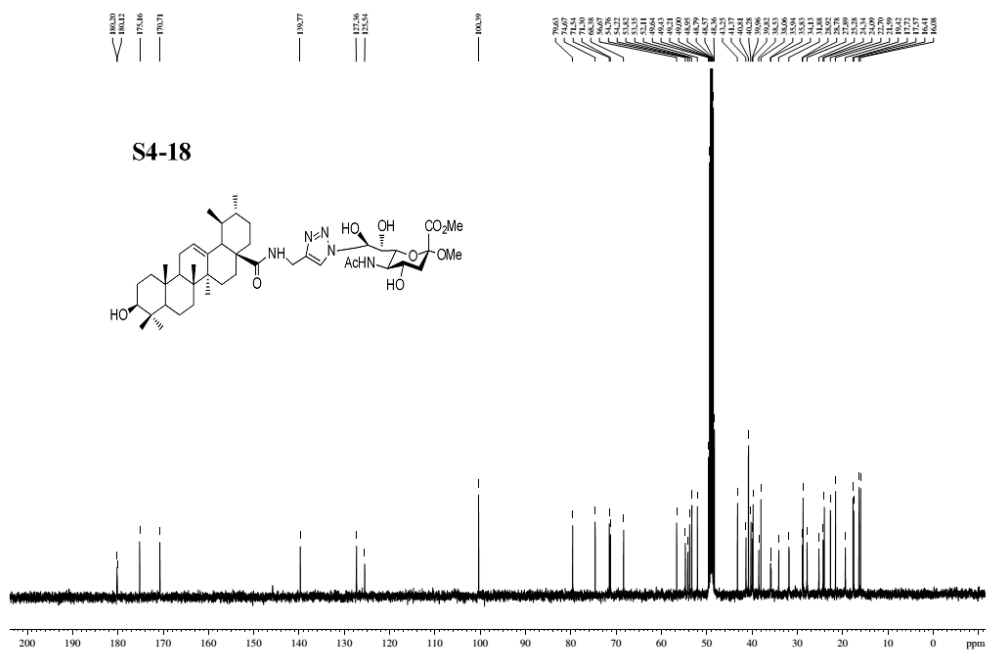

30. HR-ESI-MS spectrum of compound 26

Peking University Mass Spectrometry Sample Analysis Report

**Analysis Info**

|               |                            |                  |                       |
|---------------|----------------------------|------------------|-----------------------|
| Analysis Name | 14040508_20140411_000024.d | Acquisition Date | 4/11/2014 10:06:48 AM |
| Sample        | S4-18                      | Instrument       | Bruker Apex IV FTMS   |
| Comment       | ESI Positive               | Operator         | Peking University     |

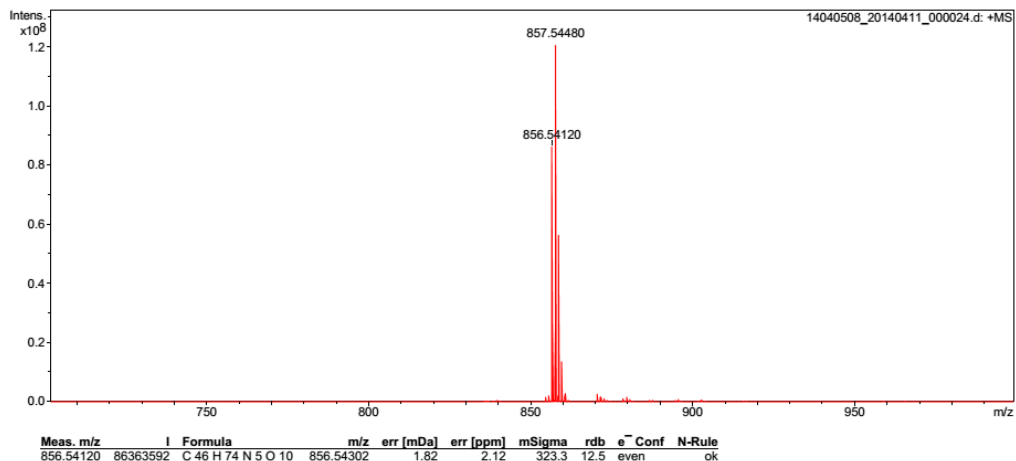

31. <sup>1</sup>H NMR (400 MHz, CDCl<sub>3</sub>) spectrum of compound 28

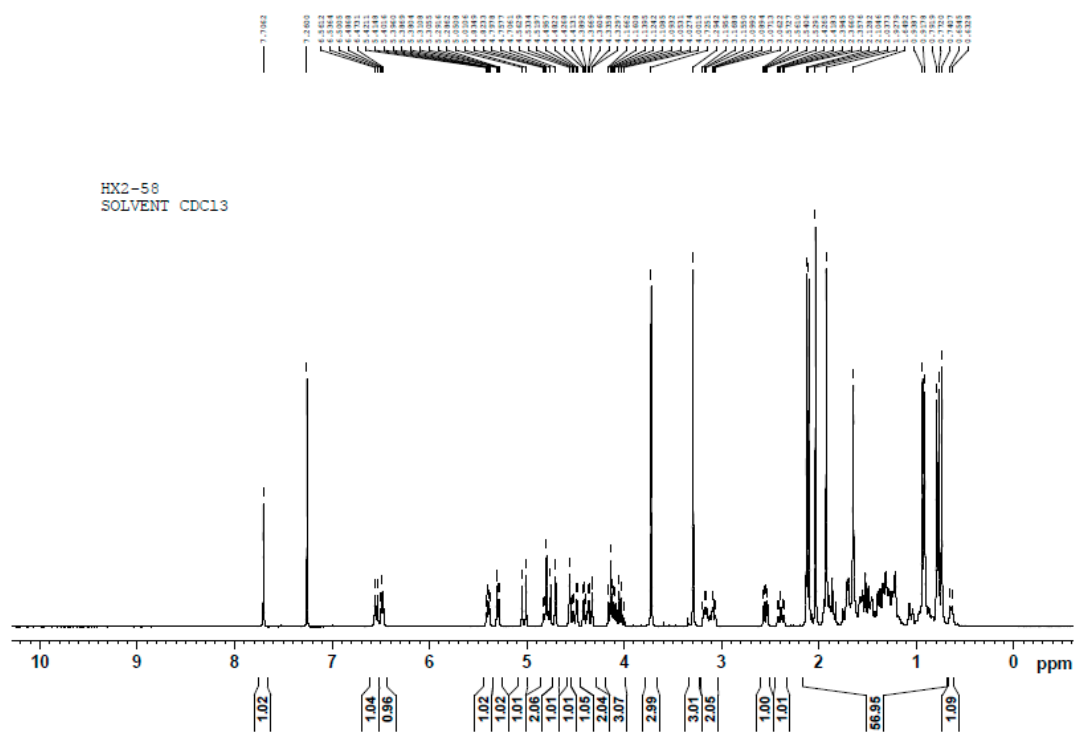

32. <sup>13</sup>C NMR (100 MHz, CDCl<sub>3</sub>) spectrum of compound 28

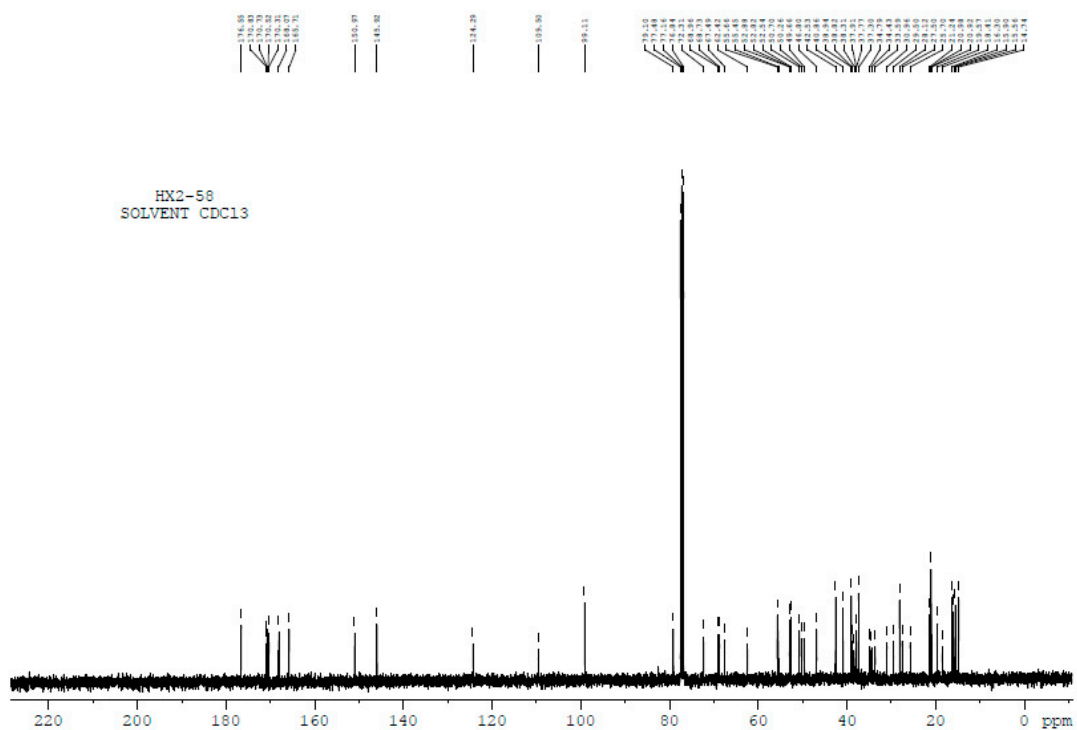

33. HR-ESI-MS spectrum of compound 28

HIGH RESOLUTION MASS SPECTROMETRY REPORT

| Sample No. | Formula (M)                                                    | Ion Formula                                                    | Measured m/z | Calc m/z  | Diff (ppm) |
|------------|----------------------------------------------------------------|----------------------------------------------------------------|--------------|-----------|------------|
| HX2-58     | C <sub>54</sub> H <sub>81</sub> N <sub>5</sub> O <sub>15</sub> | C <sub>54</sub> H <sub>82</sub> N <sub>5</sub> O <sub>15</sub> | 1040.5809    | 1040.5802 | -0.59      |

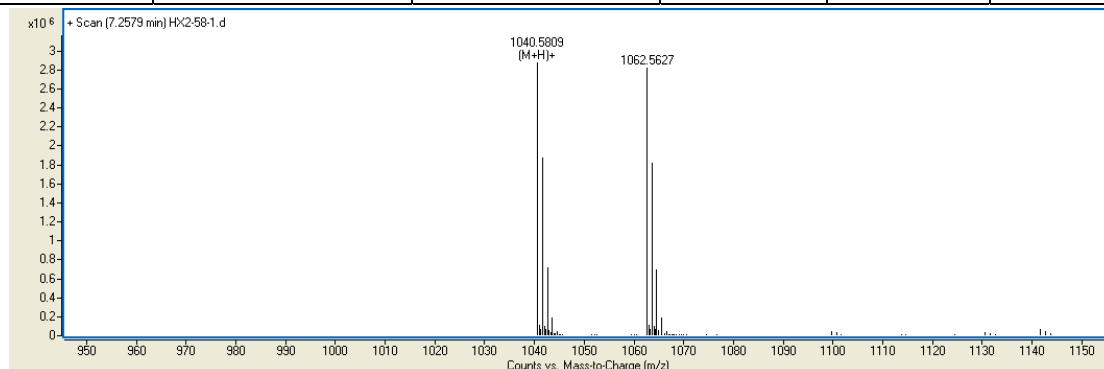

34. <sup>1</sup>H NMR (400 MHz, CD<sub>3</sub>OD) spectrum of compound 29

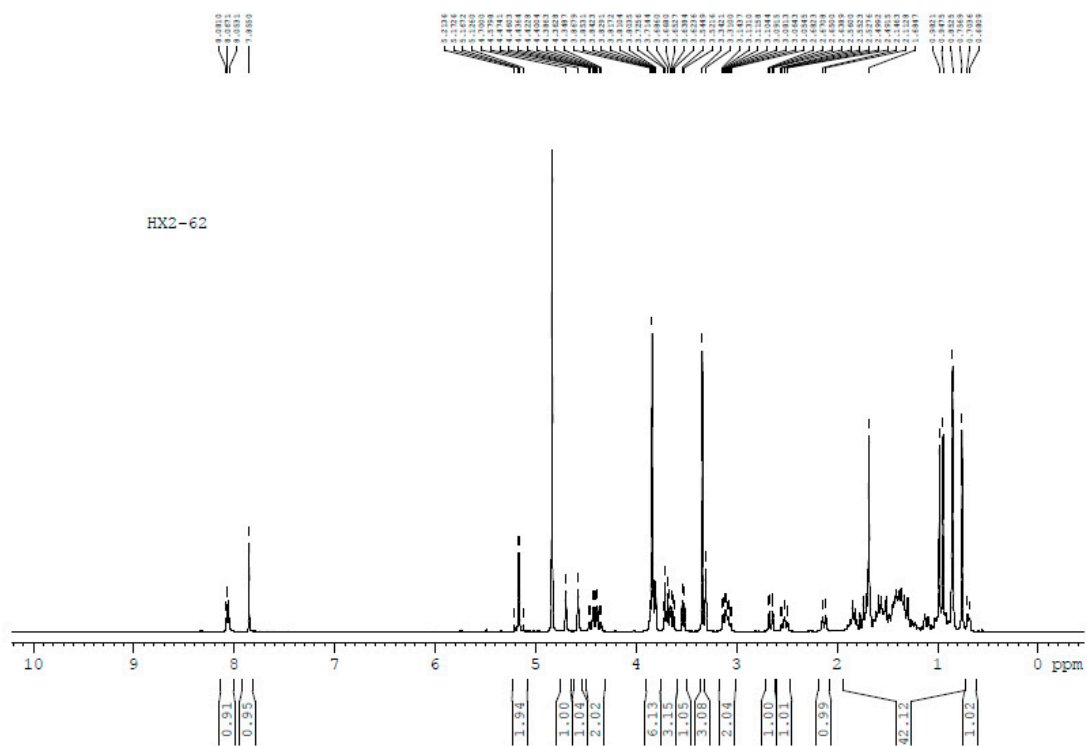

35. <sup>13</sup>C NMR (100 MHz, CD<sub>3</sub>OD) spectrum of compound **29**

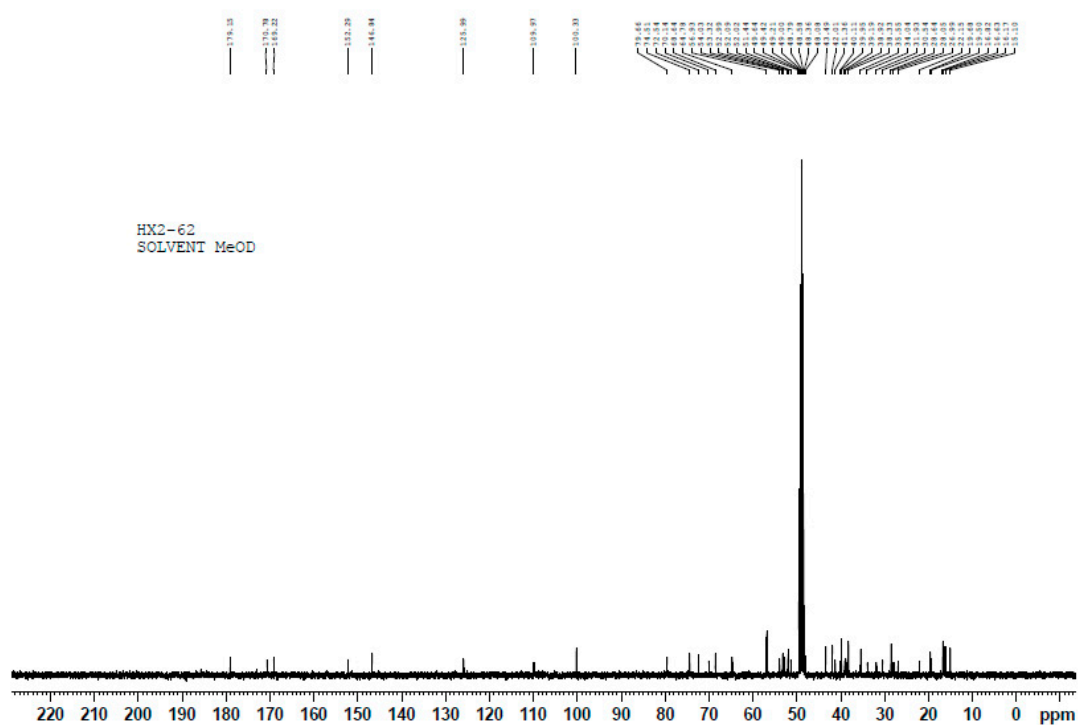

36. HR-ESI-MS spectrum of compound **29**

HIGH RESOLUTION MASS SPECTROMETRY REPORT

| Sample No. | Formula (M)                                                    | Ion Formula                                                    | Measured m/z | Calc m/z | Diff (ppm) |
|------------|----------------------------------------------------------------|----------------------------------------------------------------|--------------|----------|------------|
| HX2-62     | C <sub>46</sub> H <sub>73</sub> N <sub>5</sub> O <sub>11</sub> | C <sub>46</sub> H <sub>74</sub> N <sub>5</sub> O <sub>11</sub> | 872.5385     | 872.5379 | -0.73      |

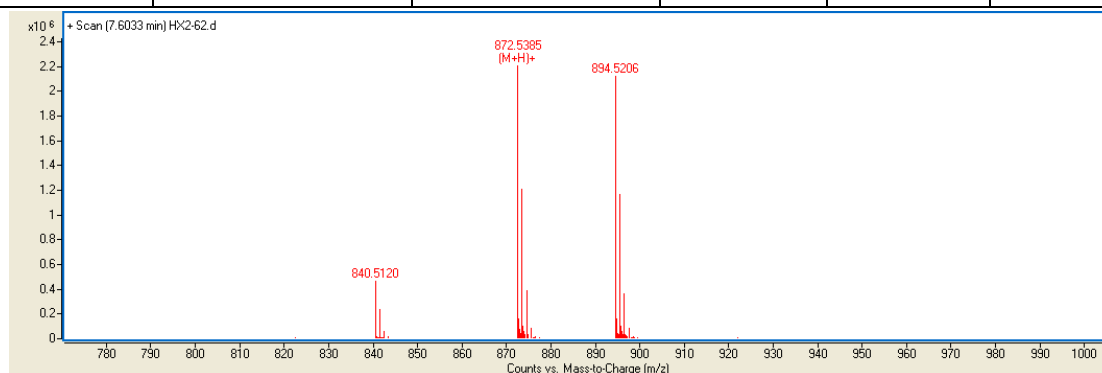

37. <sup>1</sup>H NMR (400 MHz, CD<sub>3</sub>OD) spectrum of compound 30

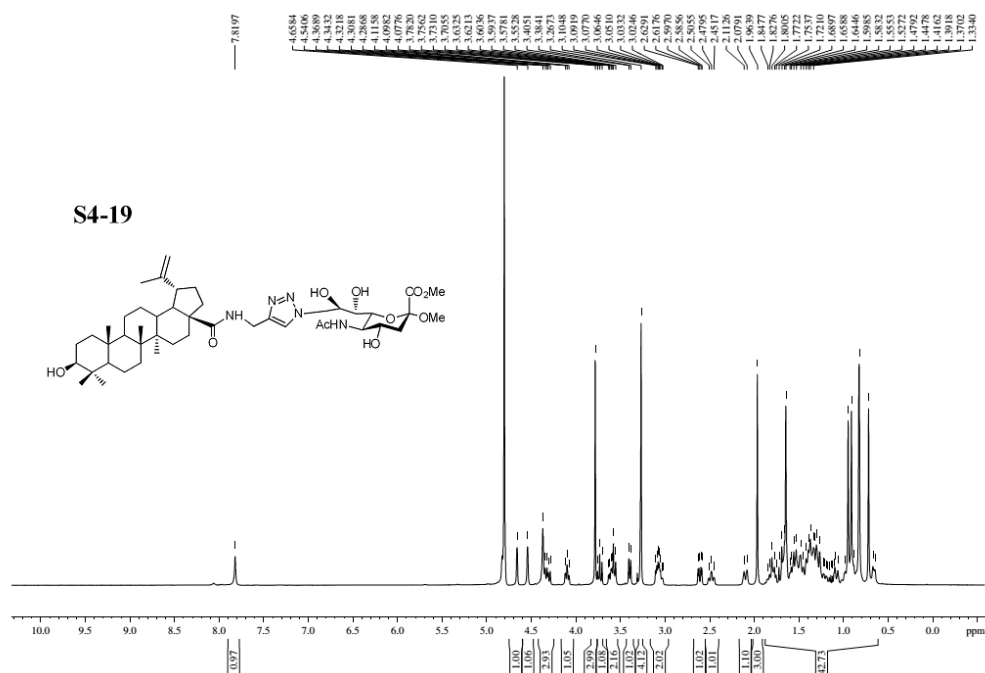

38. <sup>13</sup>C NMR (100 MHz, CD<sub>3</sub>OD) spectrum of compound 30

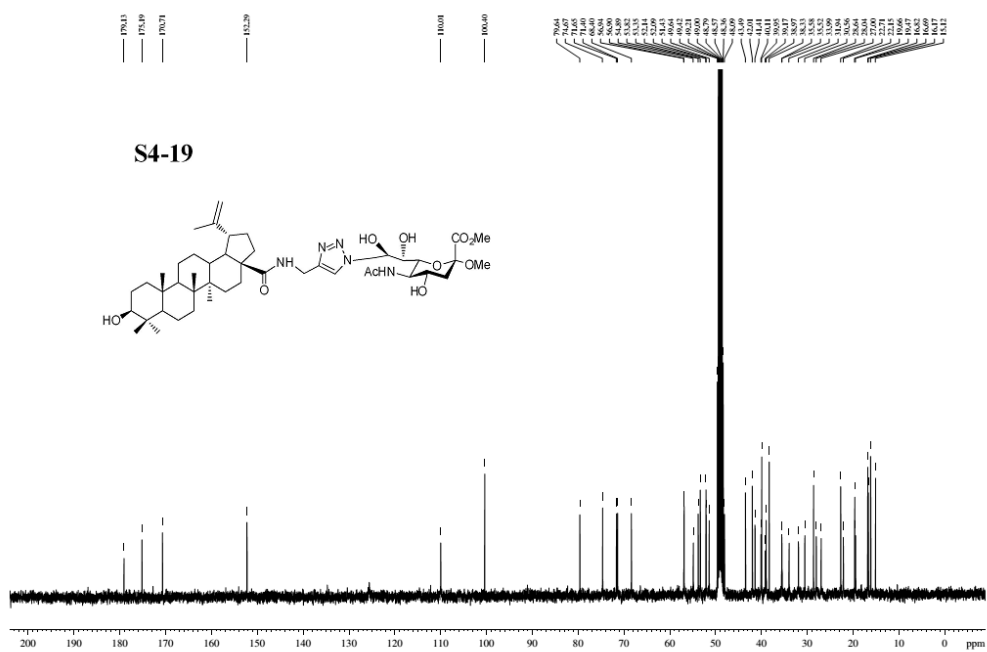

39. HR-ESI-MS spectrum of compound 30

Peking University Mass Spectrometry Sample Analysis Report

Analysis Info

Analysis Name 14040508\_20140411\_000026.d  
 Sample S4-19  
 Comment ESI Positive

Acquisition Date 4/11/2014 10:10:31 AM  
 Instrument Bruker Apex IV FTMS  
 Operator Peking University

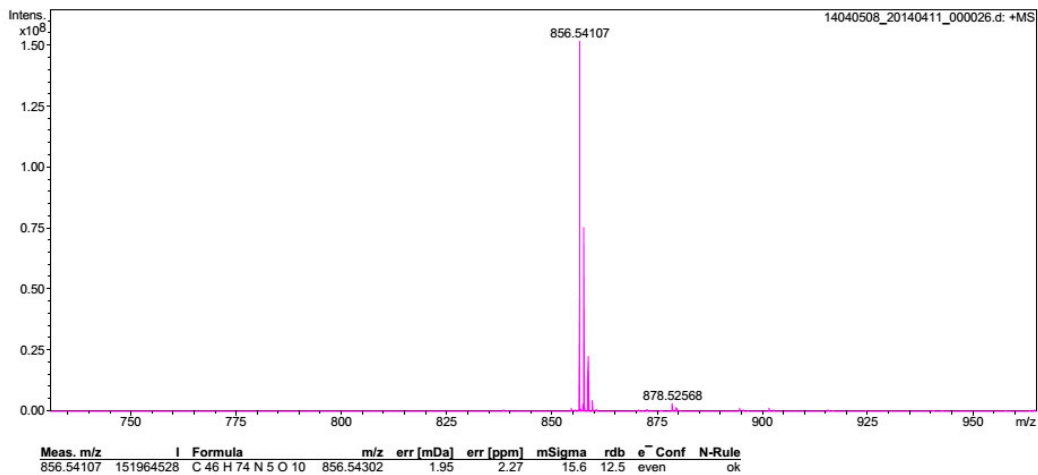

40. <sup>1</sup>H NMR (400 MHz, CDCl<sub>3</sub>) spectrum of compound 34

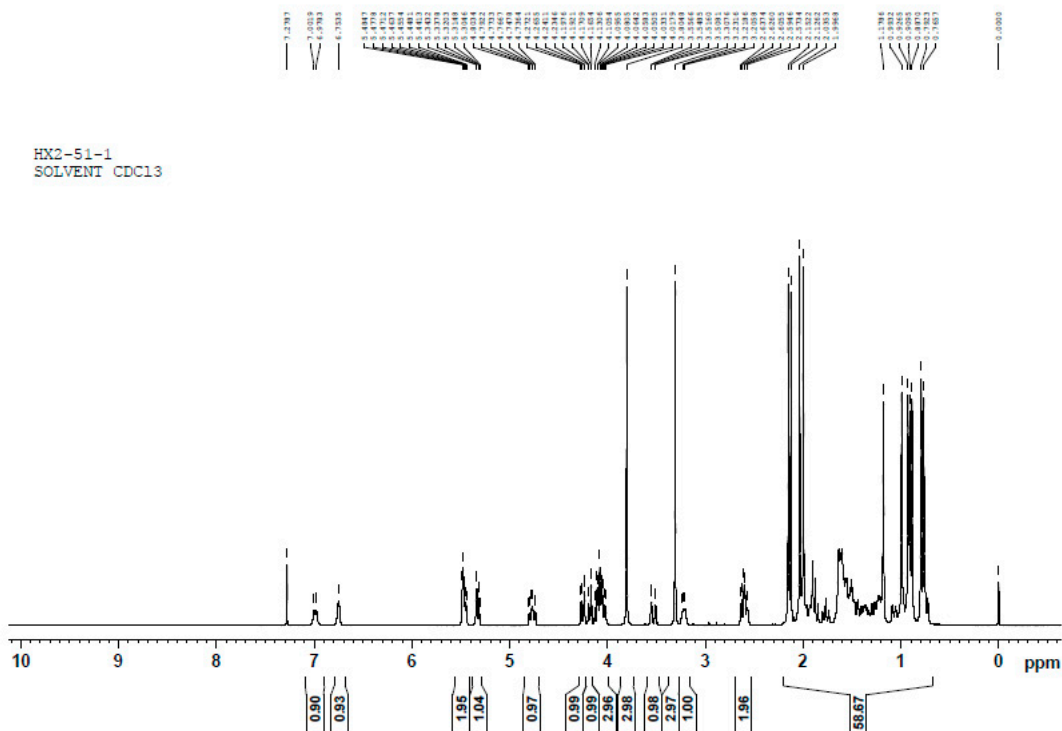

41.  $^{13}\text{C}$  NMR (100 MHz,  $\text{CDCl}_3$ ) spectrum of compound 34

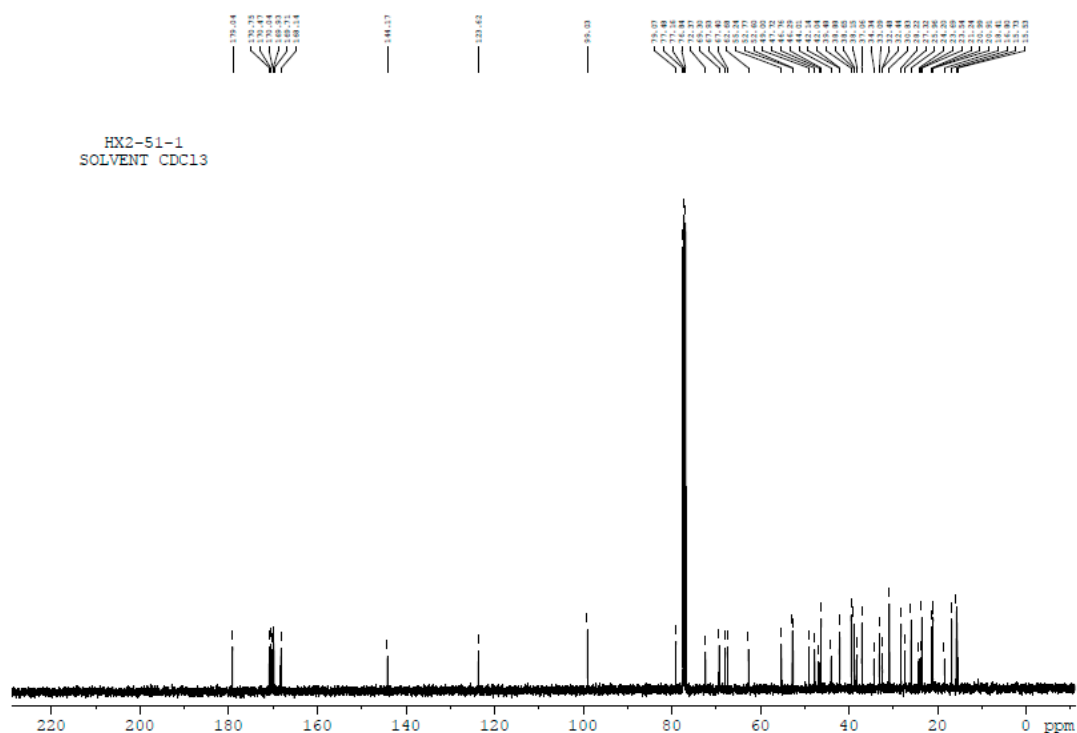

42. HR-ESI-MS spectrum of compound 34

HIGH RESOLUTION MASS SPECTROMETRY REPORT

| Sample No. | Formula (M)                                                    | Ion Formula                                                      | Measured m/z | Calc m/z | Diff (ppm) |
|------------|----------------------------------------------------------------|------------------------------------------------------------------|--------------|----------|------------|
| HX2-51     | C <sub>51</sub> H <sub>78</sub> N <sub>2</sub> O <sub>15</sub> | C <sub>51</sub> H <sub>78</sub> N <sub>2</sub> NaO <sub>15</sub> | 981.5294     | 981.5294 | 0          |

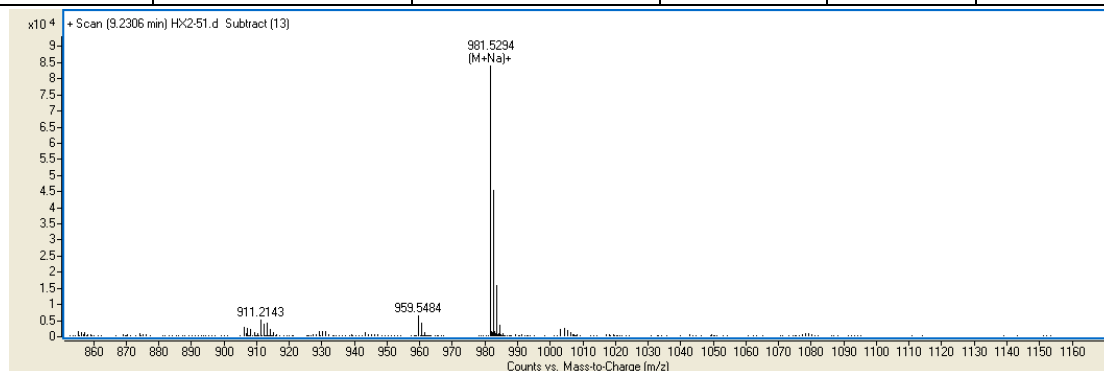



43.  $^1\text{H}$  NMR (400 MHz,  $\text{CD}_3\text{OD}$ ) spectrum of compound 35

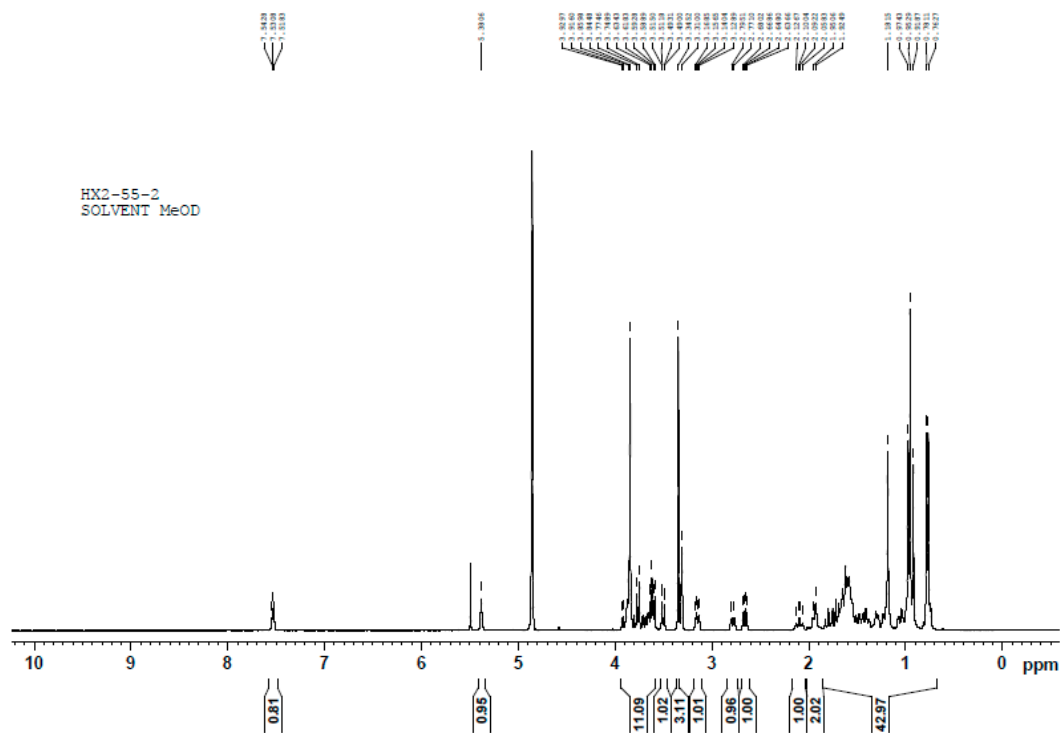

44.  $^{13}\text{C}$  NMR (100 MHz,  $\text{CD}_3\text{OD}$ ) spectrum of compound 35

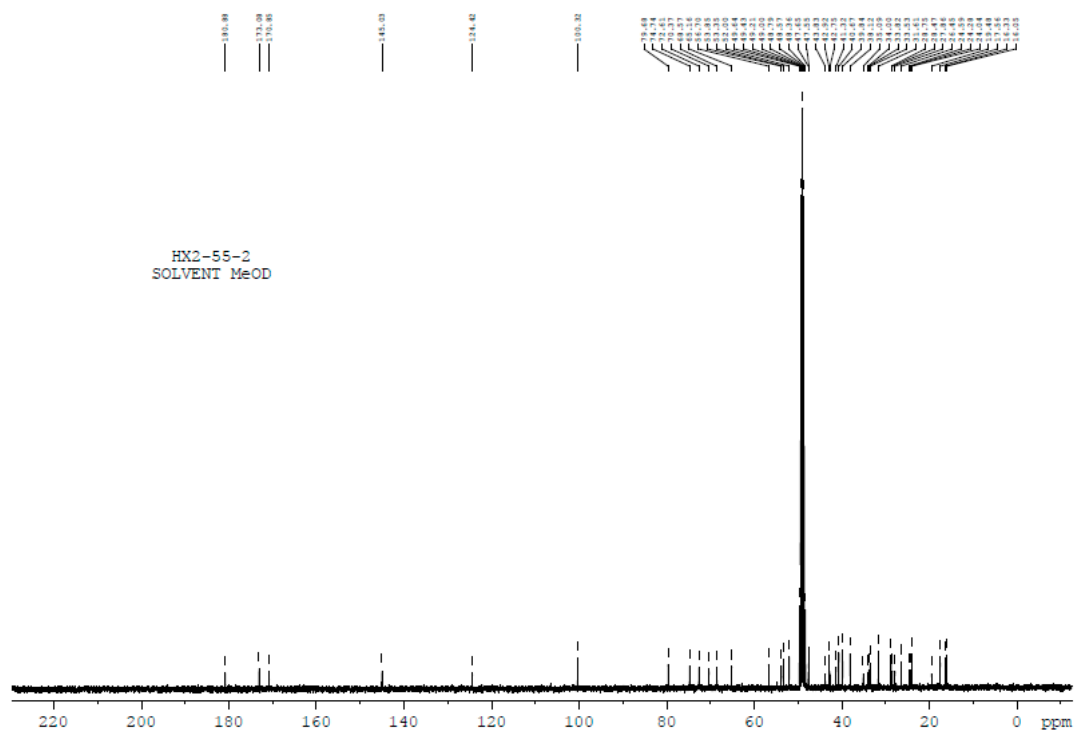

45. HR-ESI-MS spectrum of compound 35

HIGH RESOLUTION MASS SPECTROMETRY REPORT

| Sample No. | Formula (M)    | Ion Formula       | Measured m/z | Calc m/z | Diff (ppm) |
|------------|----------------|-------------------|--------------|----------|------------|
| HX2-55-2   | C43 H70 N2 O11 | C43 H70 N2 Na O11 | 813.4876     | 813.4872 | -0.39      |

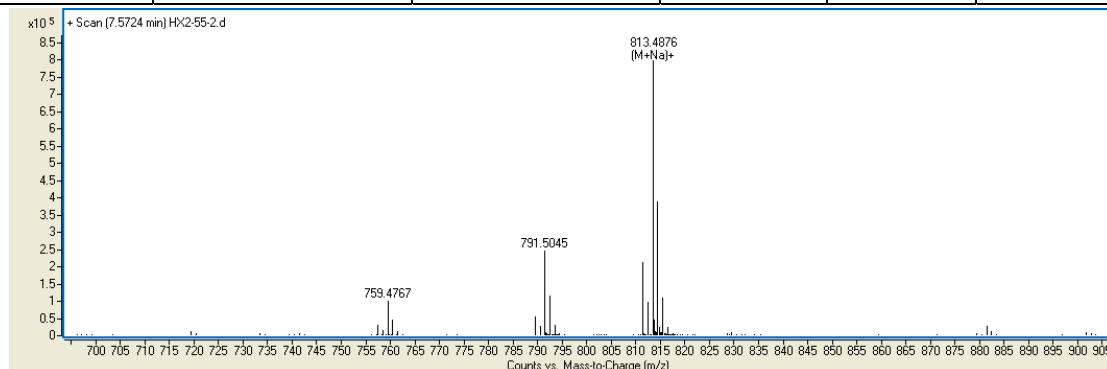

46. <sup>1</sup>H NMR (400 MHz, CDCl<sub>3</sub>) spectrum of compound 36

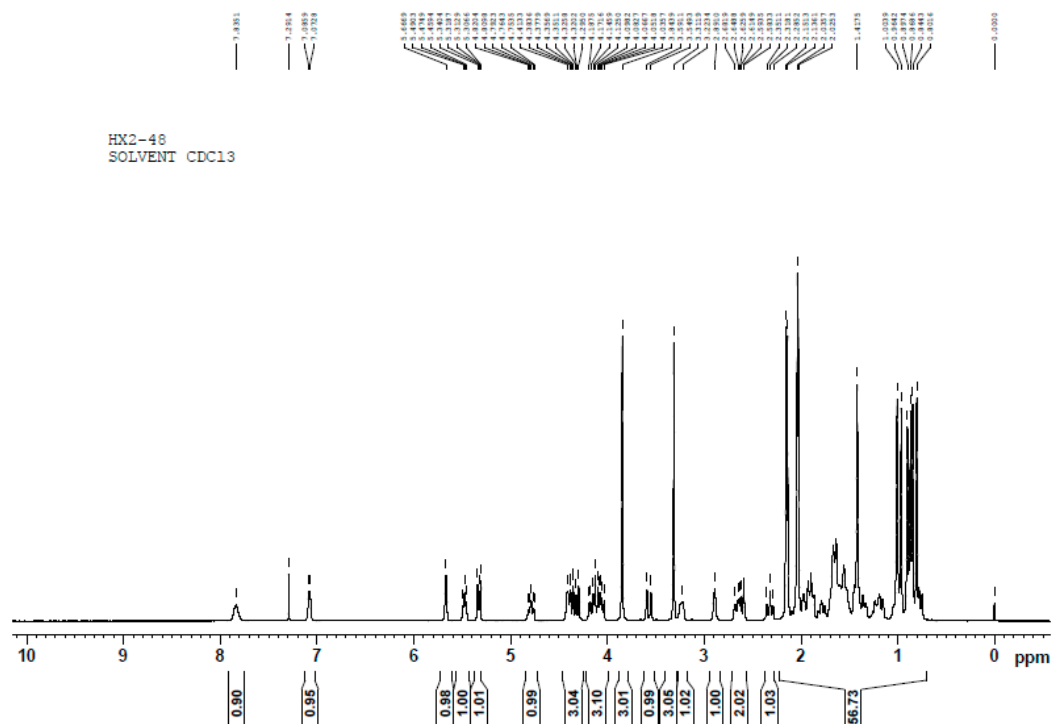

47. <sup>13</sup>C NMR (100 MHz, CDCl<sub>3</sub>) spectrum of compound 36

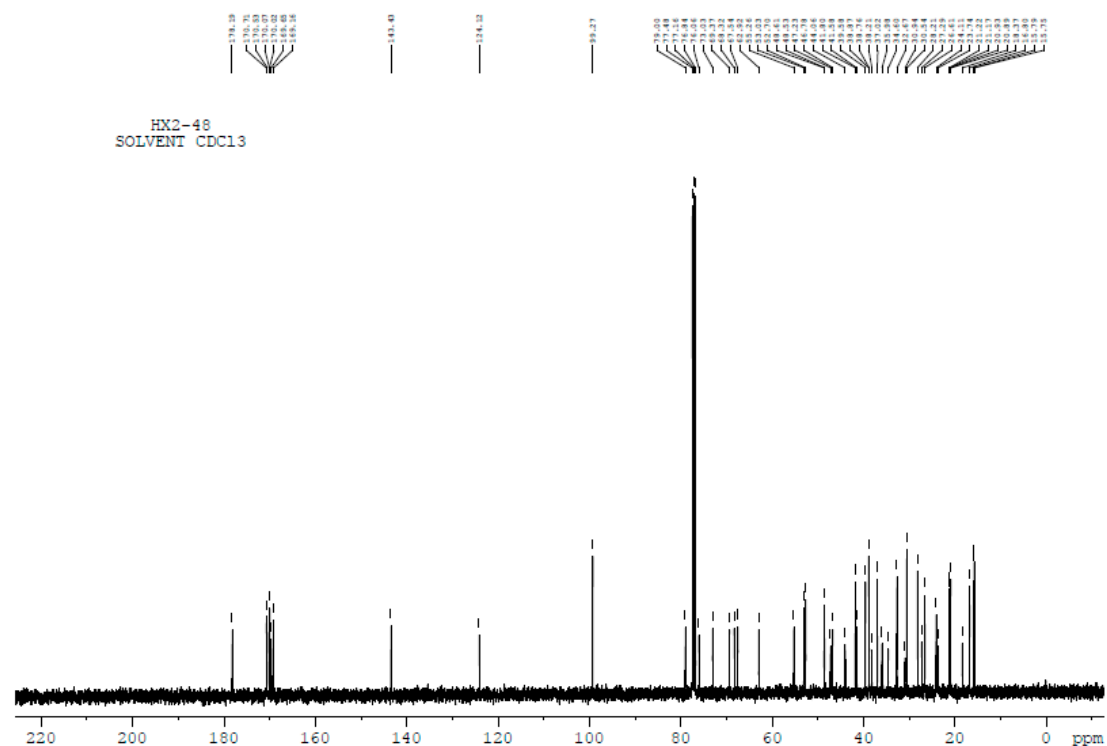

48. HR-ESI-MS spectrum of compound 36

HIGH RESOLUTION MASS SPECTROMETRY REPORT

| Sample No. | Formula (M)                                                    | Ion Formula                                                       | Measured m/z | Calc m/z | Diff (ppm) |
|------------|----------------------------------------------------------------|-------------------------------------------------------------------|--------------|----------|------------|
| HX2-48     | C <sub>51</sub> H <sub>78</sub> N <sub>2</sub> O <sub>16</sub> | C <sub>51</sub> H <sub>78</sub> N <sub>2</sub> Na O <sub>16</sub> | 997.5252     | 997.5244 | -0.83      |

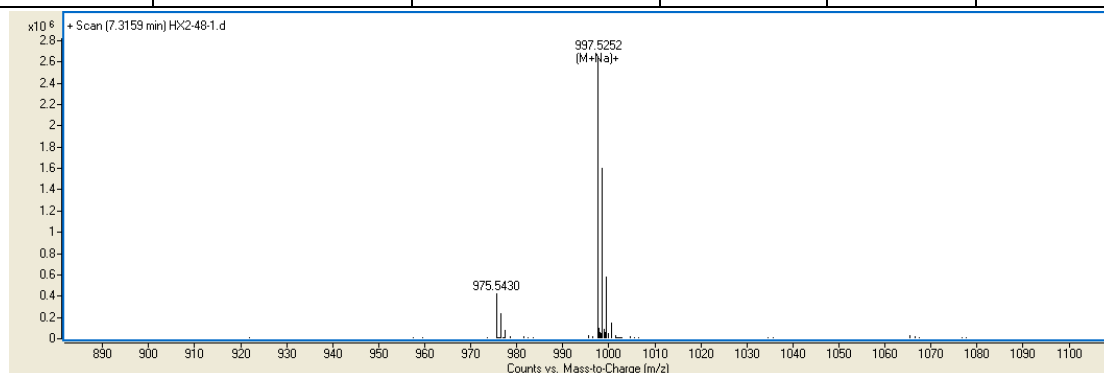

49.  $^1\text{H}$  NMR (400 MHz,  $\text{CD}_3\text{OD}$ ) spectrum of compound **37**

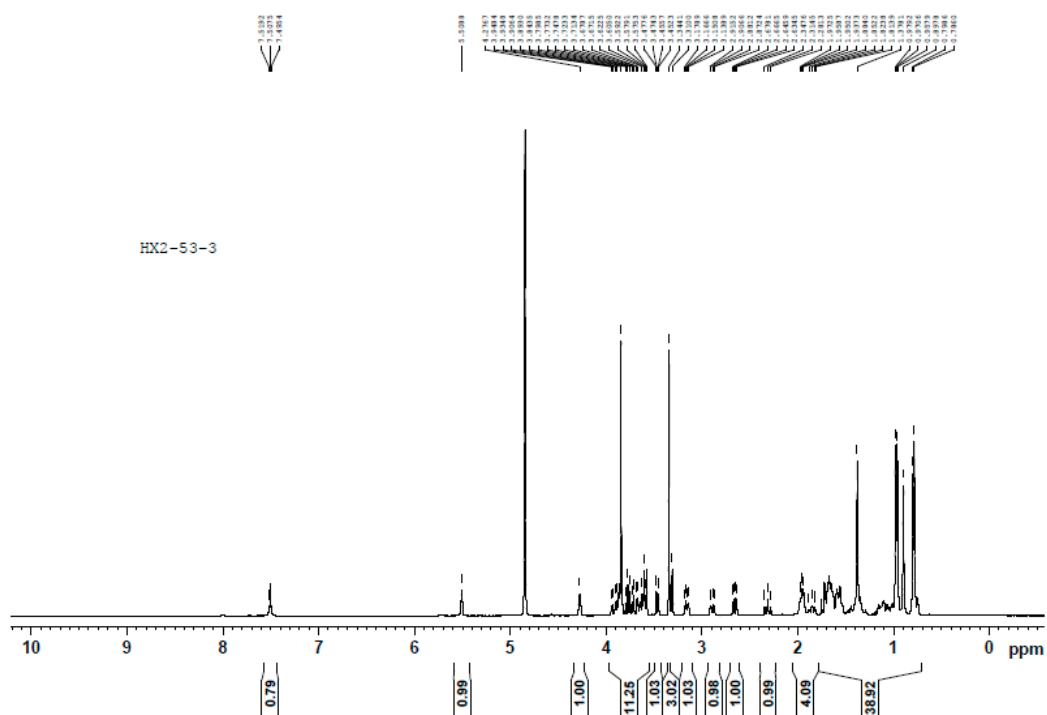

50.  $^{13}\text{C}$  NMR (100 MHz,  $\text{CD}_3\text{OD}$ ) spectrum of compound **37**

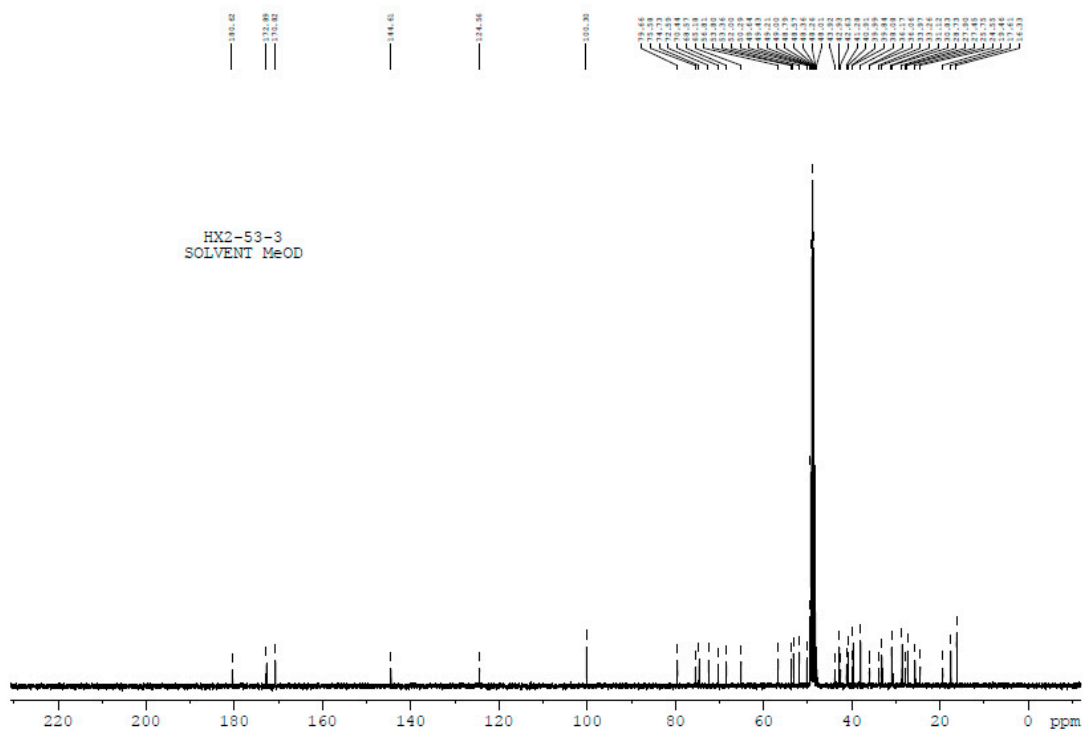

51. HR-ESI-MS spectrum of compound 37

HIGH RESOLUTION MASS SPECTROMETRY REPORT

| Sample No. | Formula (M)    | Ion Formula       | Measured m/z | Calc m/z | Diff (ppm) |
|------------|----------------|-------------------|--------------|----------|------------|
| HX2-53-5   | C43 H70 N2 O12 | C43 H70 N2 Na O12 | 829.4826     | 829.4821 | -0.84      |

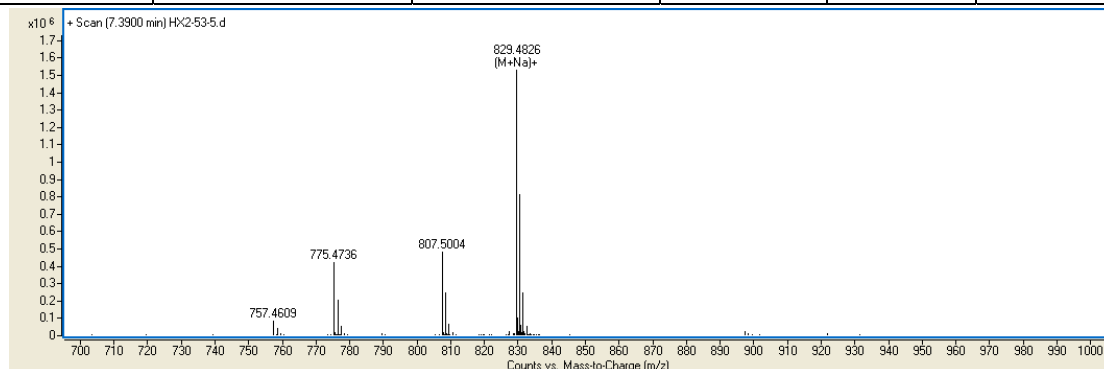

52. <sup>1</sup>H NMR (400 MHz, CDCl<sub>3</sub>) spectrum of compound 38

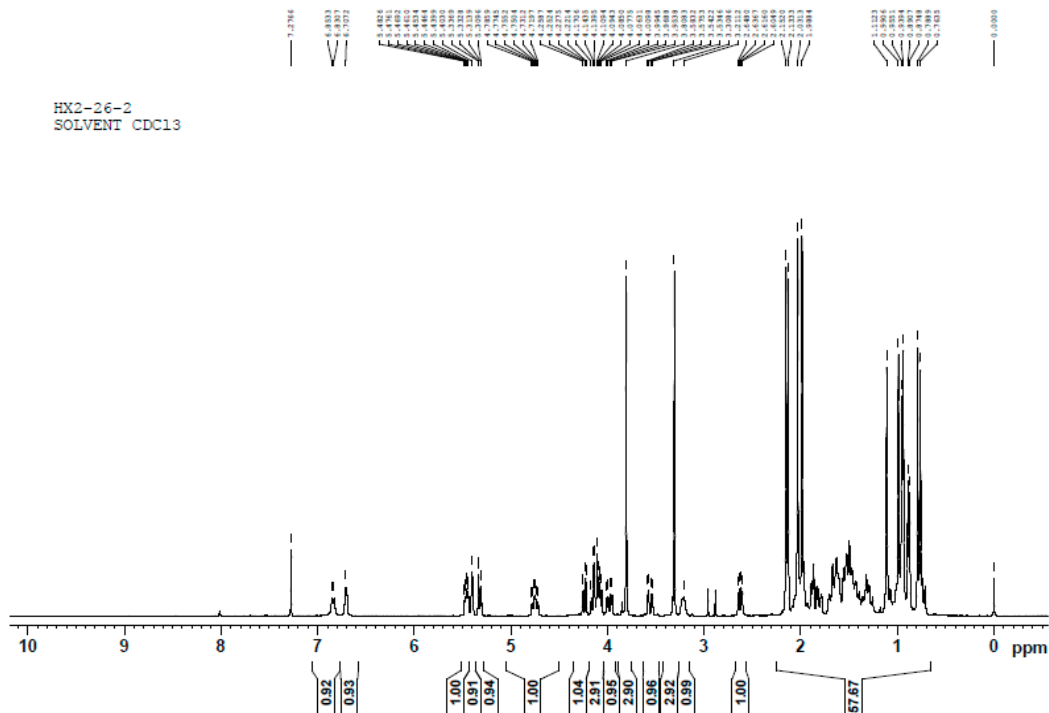

53. <sup>13</sup>C NMR (100 MHz, CDCl<sub>3</sub>) spectrum of compound 38

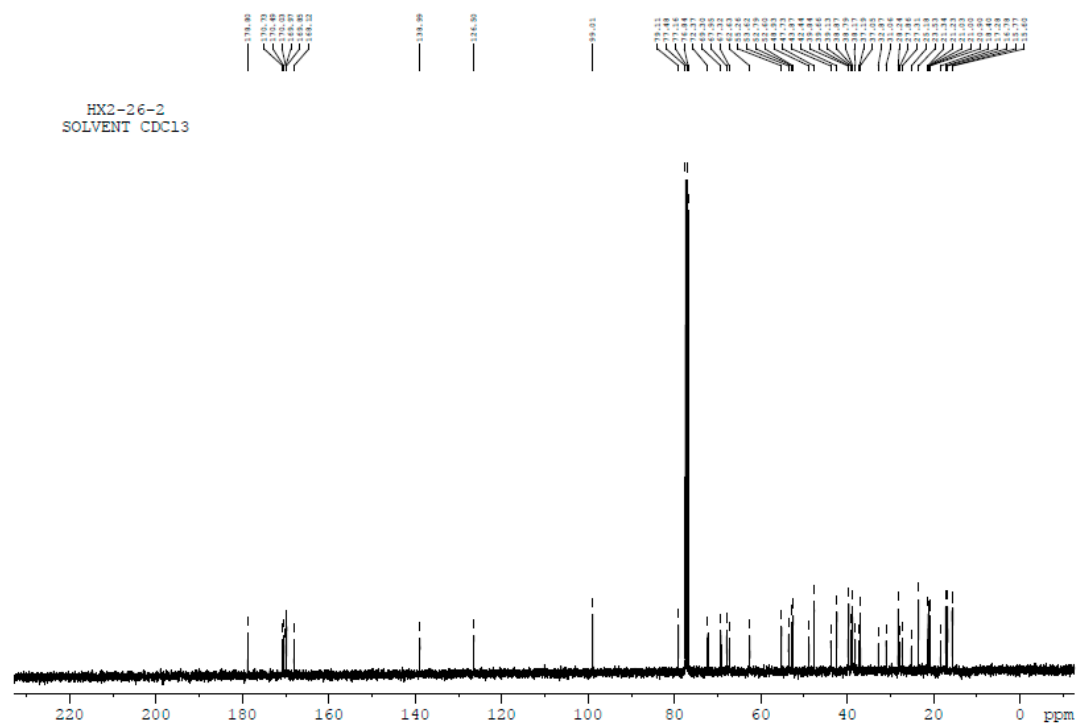

54. HR-ESI-MS spectrum of compound 38

HIGH RESOLUTION MASS SPECTROMETRY REPORT

| Sample No. | Formula (M)                                                    | Ion Formula                                                    | Measured m/z | Calc m/z | Diff (ppm) |
|------------|----------------------------------------------------------------|----------------------------------------------------------------|--------------|----------|------------|
| HX2-26     | C <sub>51</sub> H <sub>78</sub> N <sub>2</sub> O <sub>15</sub> | C <sub>51</sub> H <sub>79</sub> N <sub>2</sub> O <sub>15</sub> | 959.5472     | 959.5475 | 0.34       |

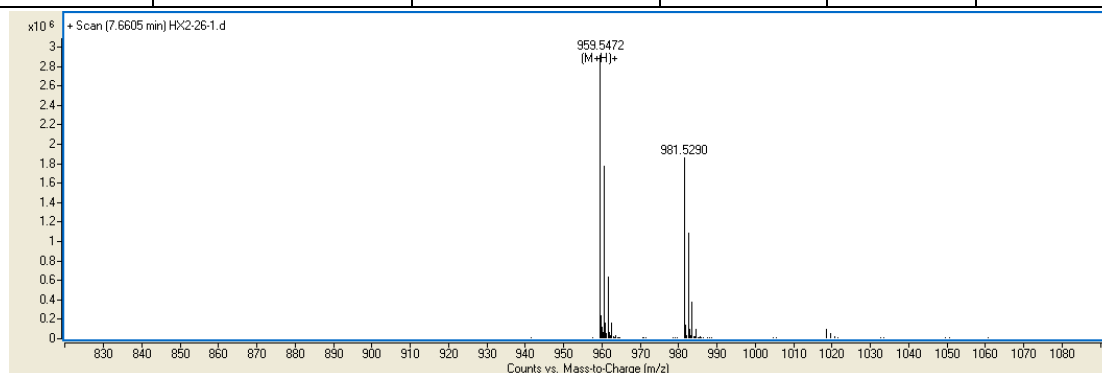

55.  $^1\text{H}$  NMR (400 MHz,  $\text{CD}_3\text{OD}$ ) spectrum of compound 39

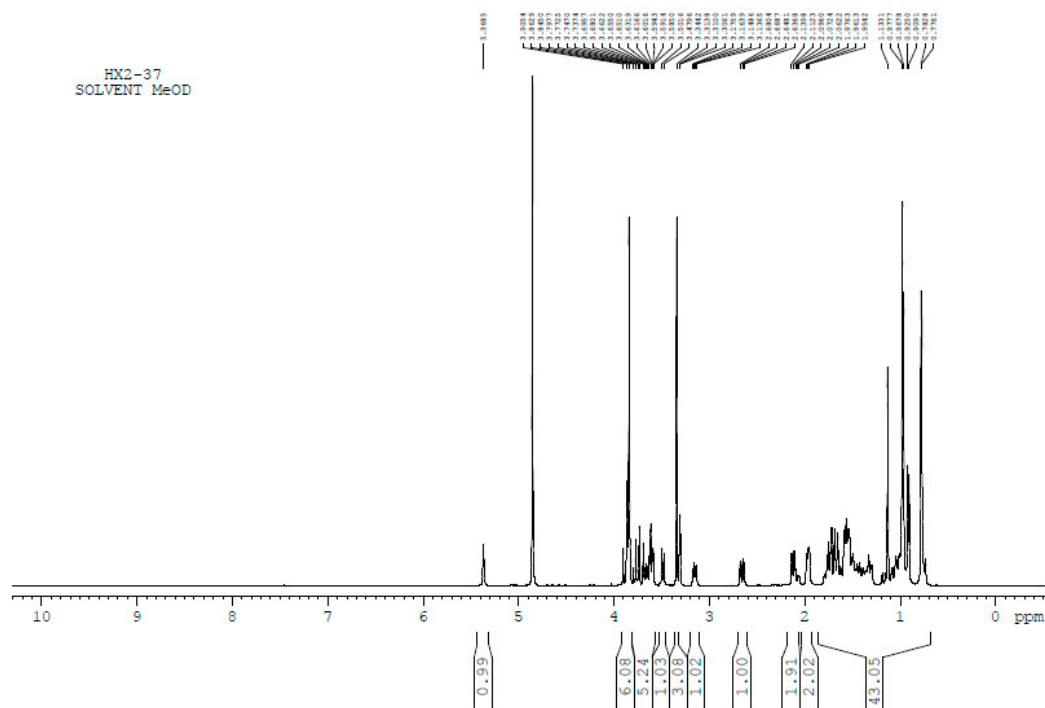

56.  $^{13}\text{C}$  NMR (100 MHz,  $\text{CD}_3\text{OD}$ ) spectrum of compound 39

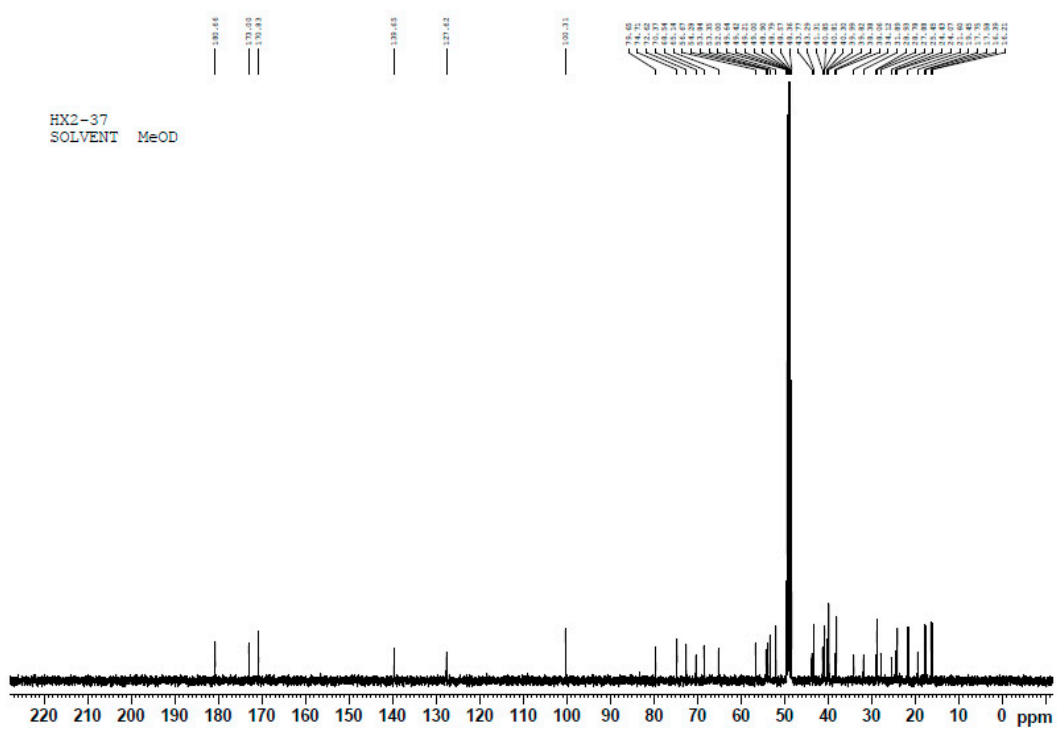

57. HR-ESI-MS spectrum of compound 39

HIGH RESOLUTION MASS SPECTROMETRY REPORT

| Sample No. | Formula (M)                                                    | Ion Formula                                                       | Measured m/z | Calc m/z | Diff (ppm) |
|------------|----------------------------------------------------------------|-------------------------------------------------------------------|--------------|----------|------------|
| HX2-37     | C <sub>43</sub> H <sub>70</sub> N <sub>2</sub> O <sub>11</sub> | C <sub>43</sub> H <sub>70</sub> N <sub>2</sub> Na O <sub>11</sub> | 813.4879     | 813.4872 | -1.05      |

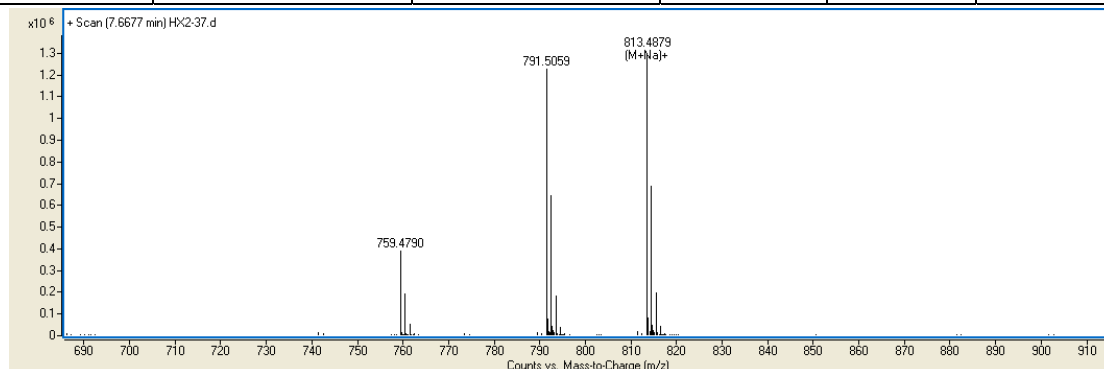

58. <sup>1</sup>H NMR (400 MHz, CD<sub>3</sub>OD) spectrum of compound 40

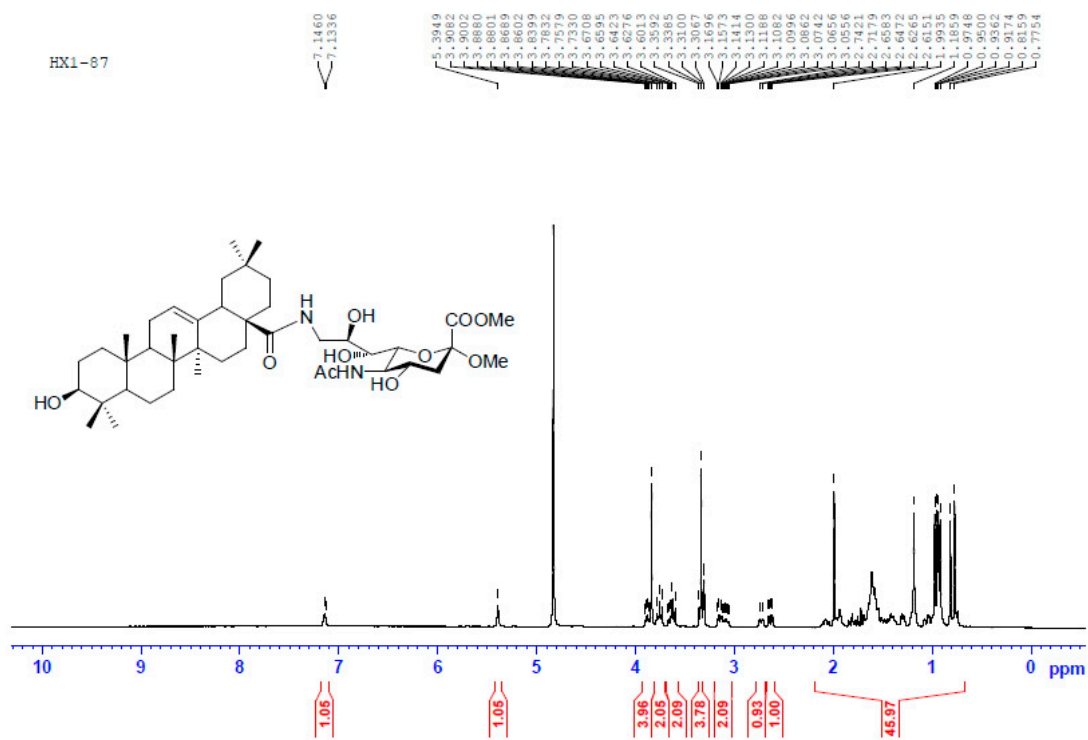



59.  $^{13}\text{C}$  NMR (100 MHz,  $\text{CD}_3\text{OD}$ ) spectrum of compound 40

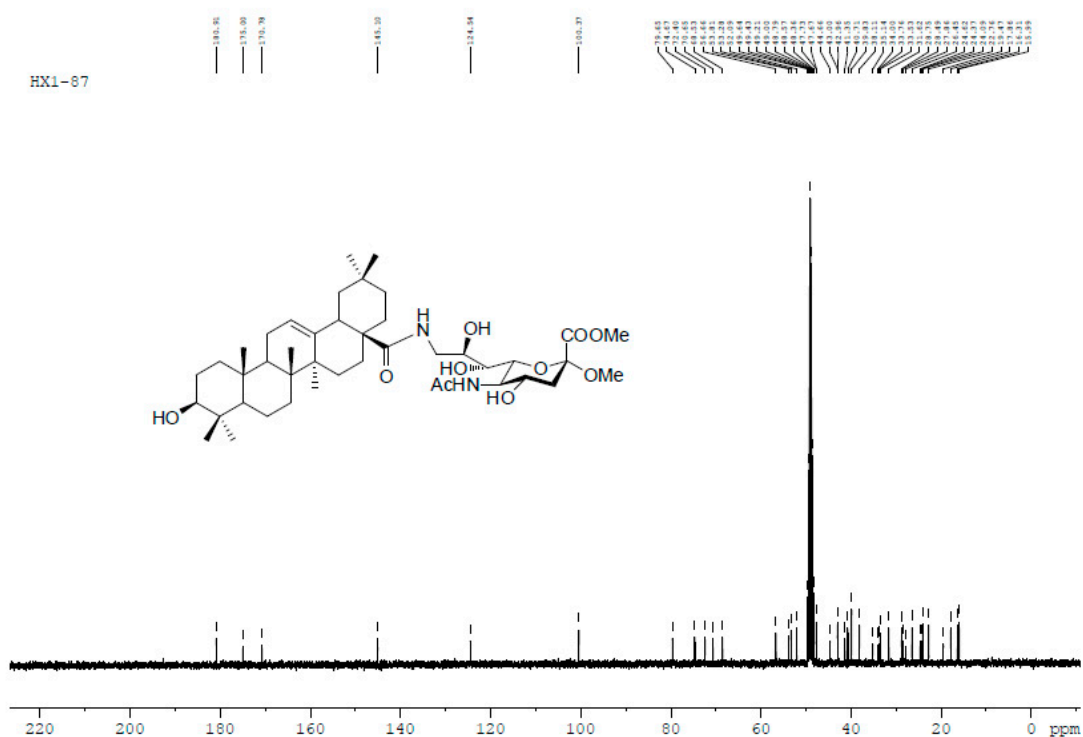

60. HR-ESI-MS spectrum of compound 40

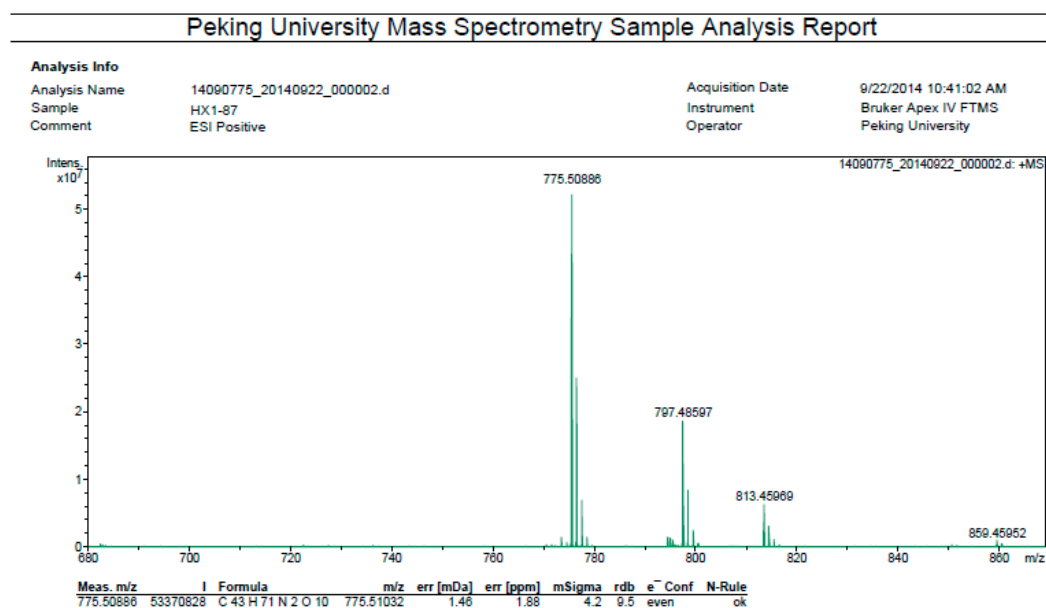

61. <sup>1</sup>H NMR (400 MHz, CD<sub>3</sub>OD) spectrum of compound 41

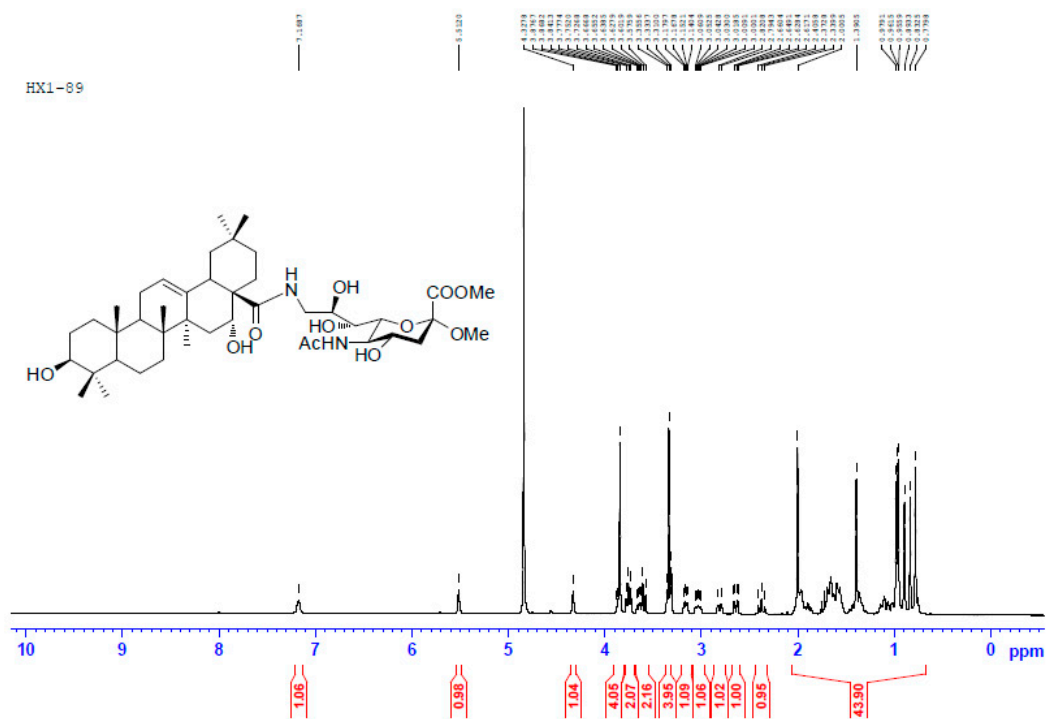

62. <sup>13</sup>C NMR (100 MHz, CD<sub>3</sub>OD) spectrum of compound 41

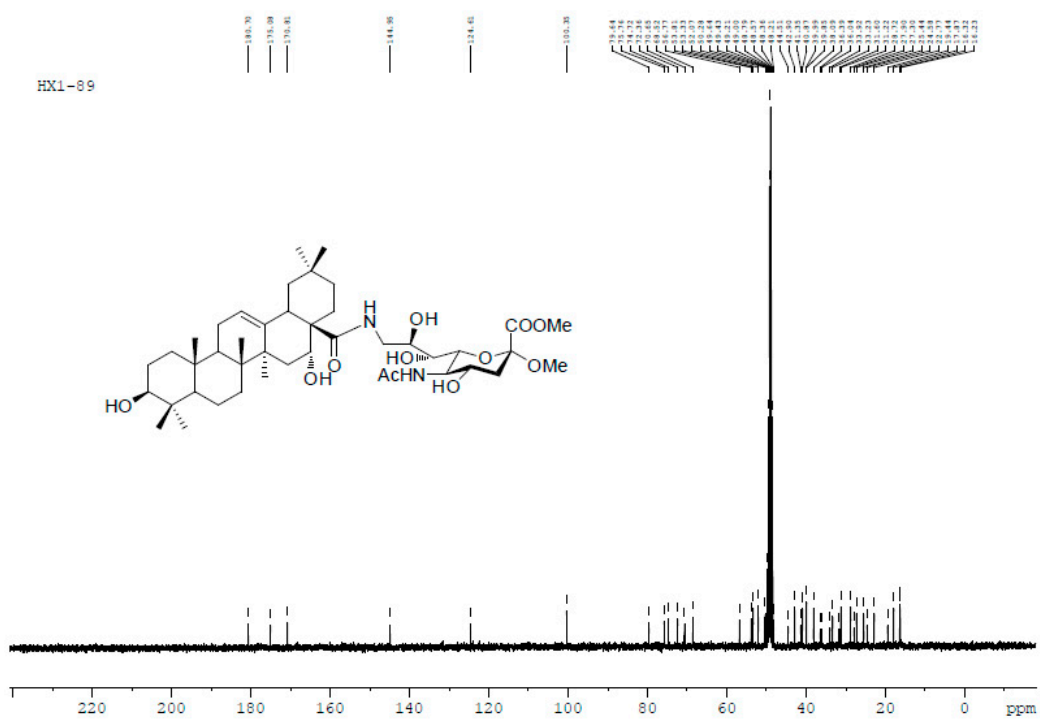

63. HR-ESI-MS spectrum of compound 41

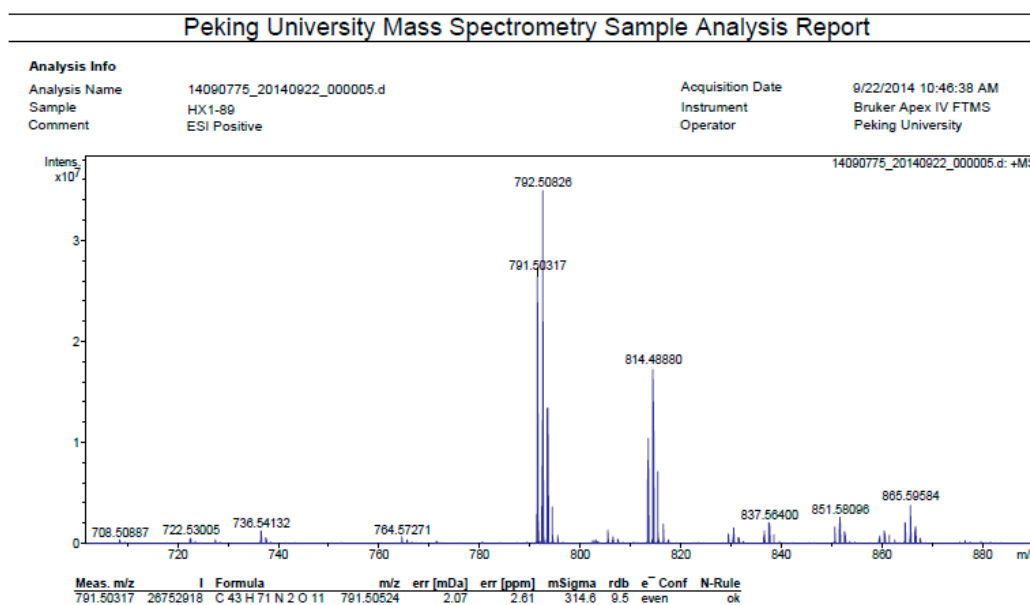

64. <sup>1</sup>H NMR (400 MHz, CD<sub>3</sub>OD) spectrum of compound 42

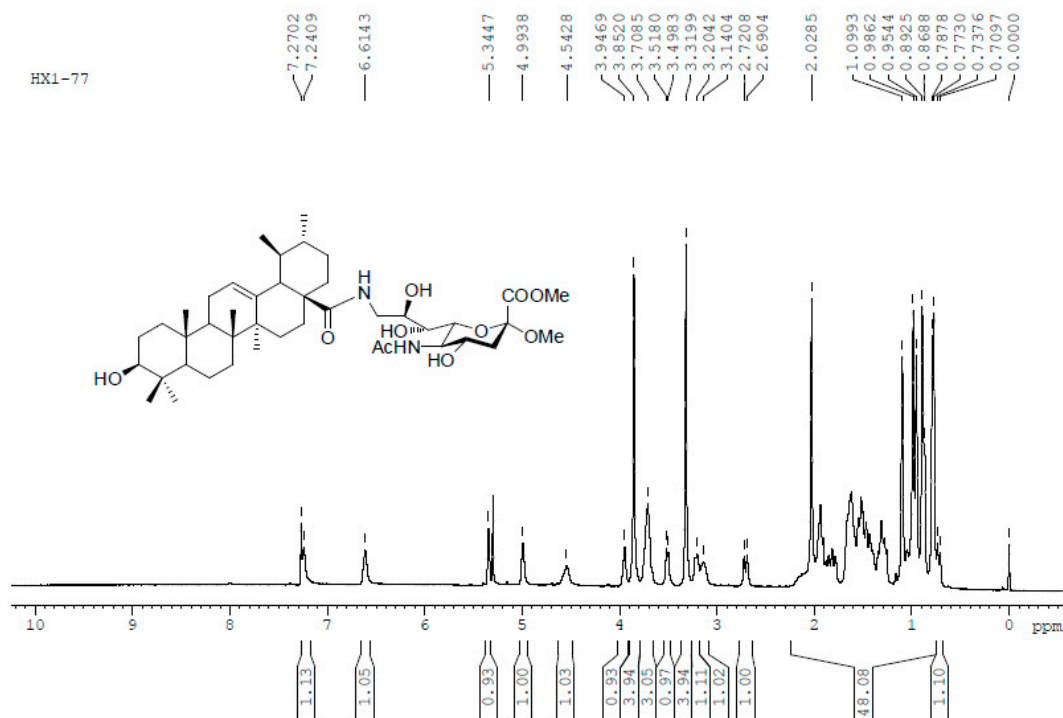

65. <sup>13</sup>C NMR (100 MHz, CD<sub>3</sub>OD) spectrum of compound 42

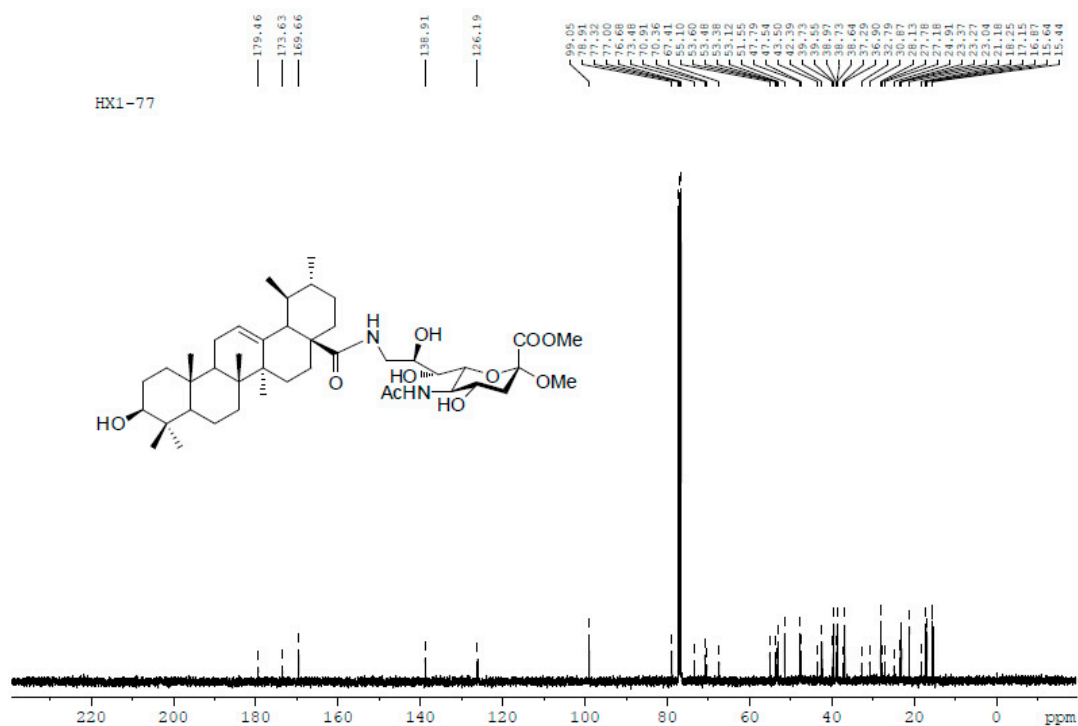

66. HR-ESI-MS spectrum of compound 42

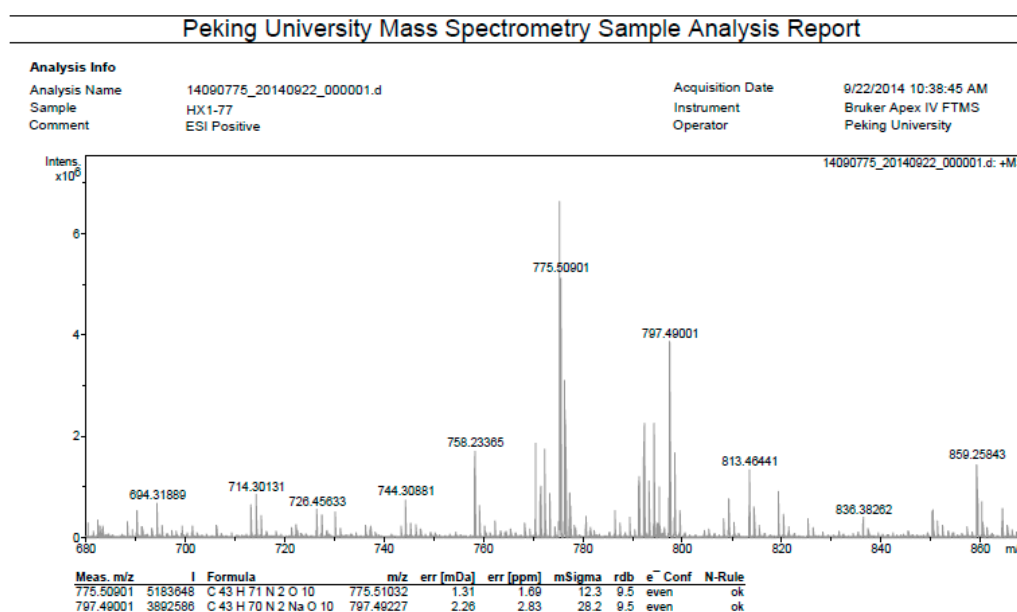



69. HR-ESI-MS spectrum of compound 44

HIGH RESOLUTION MASS SPECTROMETRY REPORT

| Sample No. | Formula (M)    | Ion Formula    | Measured m/z | Calc m/z | Diff (ppm) |
|------------|----------------|----------------|--------------|----------|------------|
| HX2-46     | C51 H78 N2 O15 | C51 H79 N2 O15 | 959.5481     | 959.5475 | -0.45      |

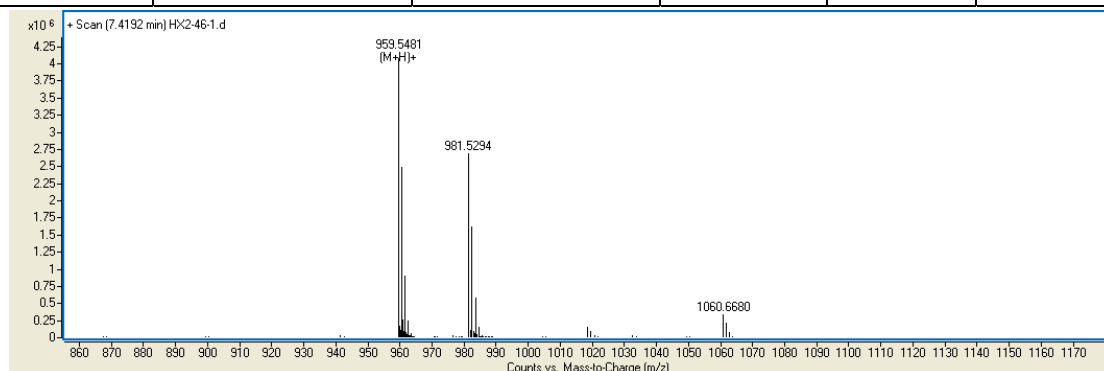

70. <sup>1</sup>H NMR (400 MHz, CD<sub>3</sub>OD) spectrum of compound 45

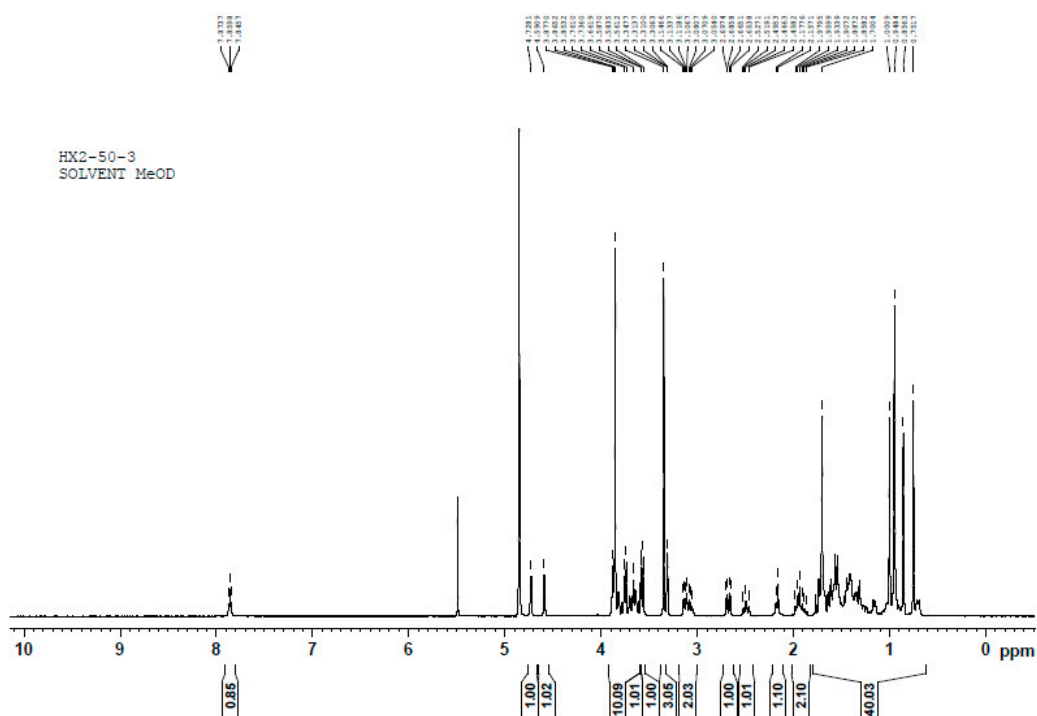

71. <sup>13</sup>C NMR (100 MHz, CD<sub>3</sub>OD) spectrum of compound 45

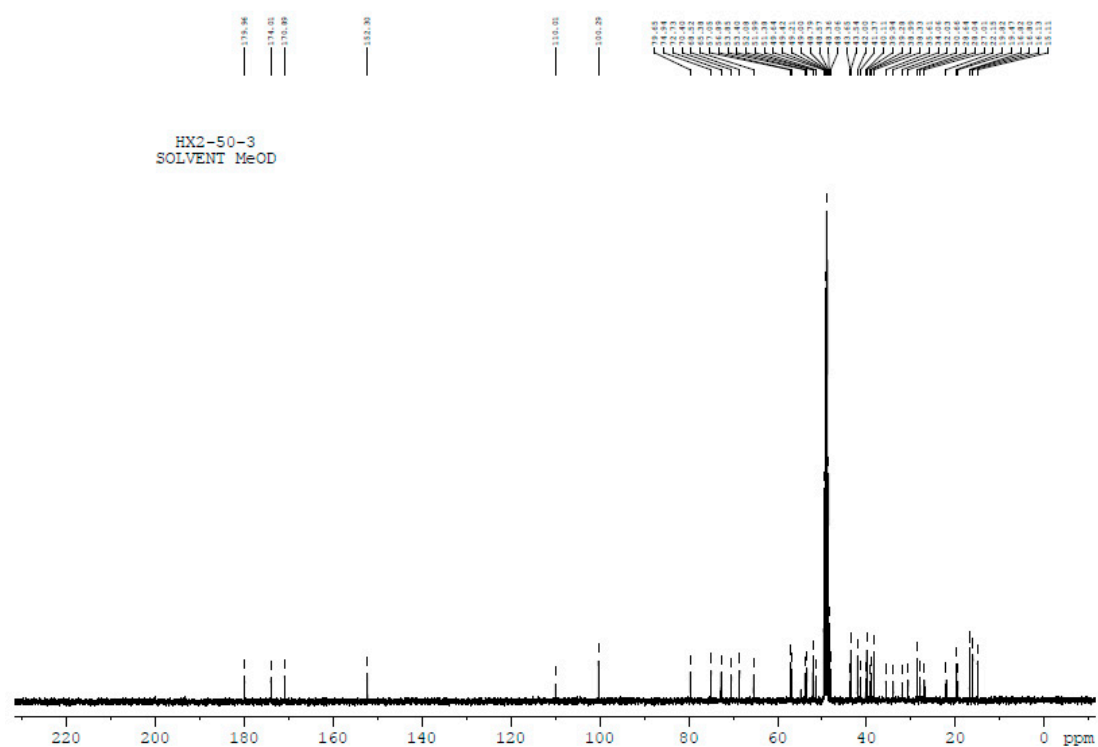

72. HR-ESI-MS spectrum of compound 45

HIGH RESOLUTION MASS SPECTROMETRY REPORT

| Sample No. | Formula (M)                                                    | Ion Formula                                                       | Measured m/z | Calc m/z | Diff (ppm) |
|------------|----------------------------------------------------------------|-------------------------------------------------------------------|--------------|----------|------------|
| HX2-50     | C <sub>43</sub> H <sub>70</sub> N <sub>2</sub> O <sub>11</sub> | C <sub>43</sub> H <sub>70</sub> N <sub>2</sub> Na O <sub>11</sub> | 813.4878     | 813.4872 | -0.82      |

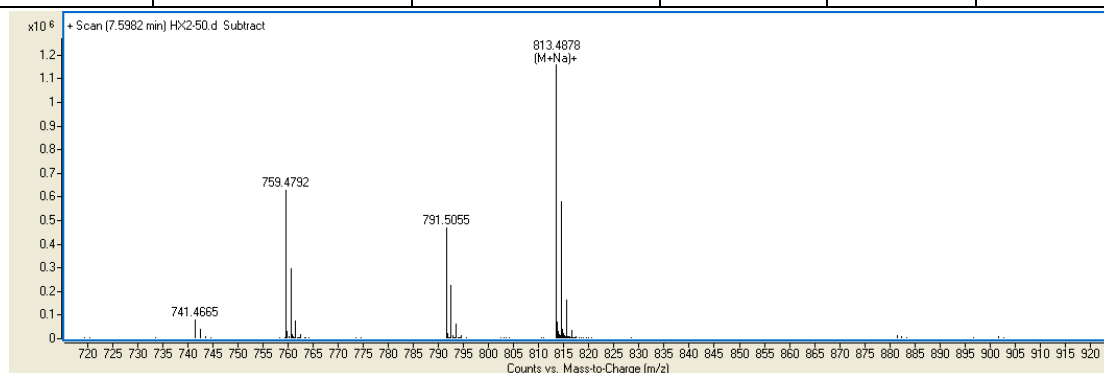

73. <sup>1</sup>H NMR (400 MHz, CD<sub>3</sub>OD) spectrum of compound 46

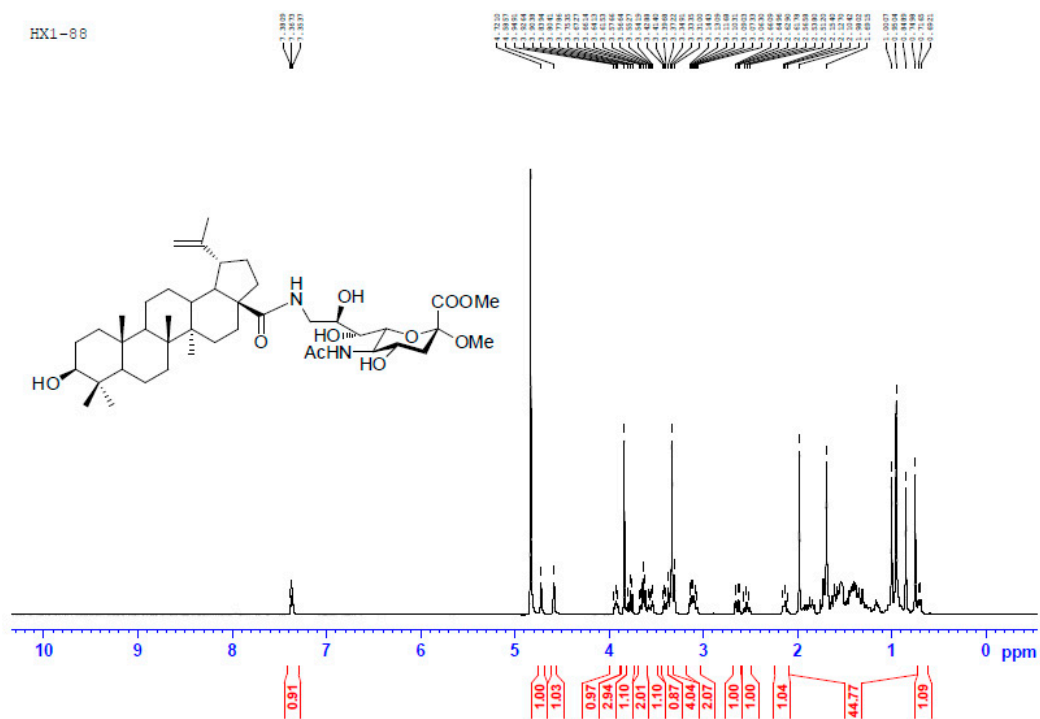

74. <sup>13</sup>C NMR (100 MHz, CD<sub>3</sub>OD) spectrum of compound 46

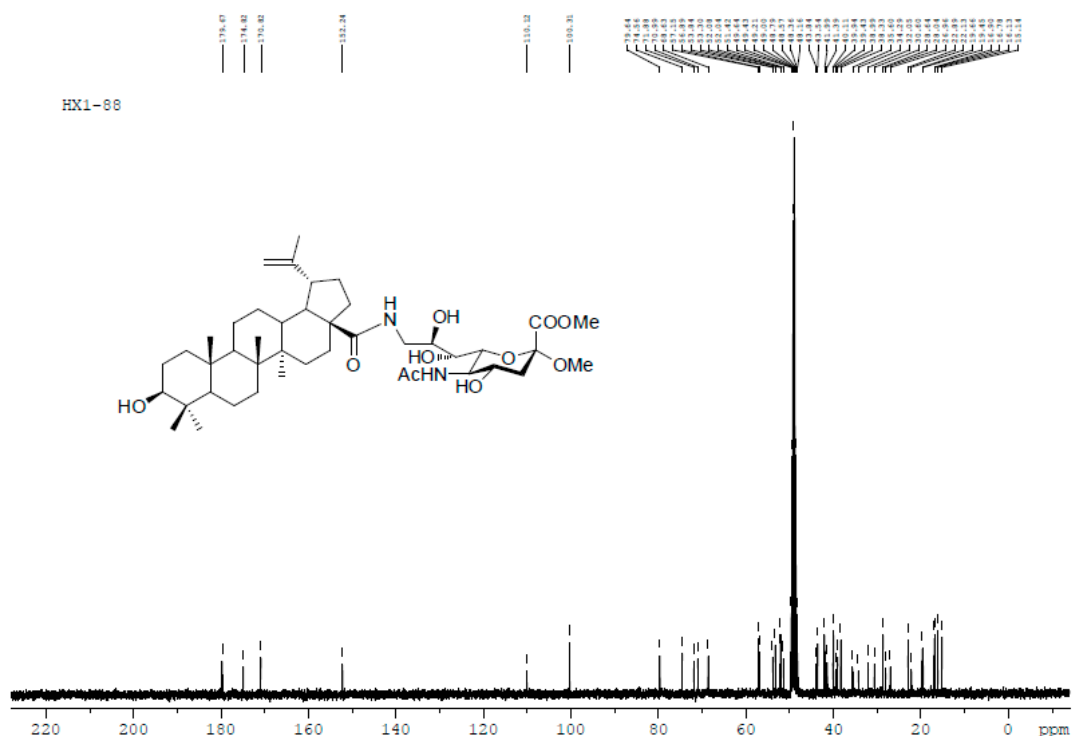



75. HR-ESI-MS spectrum of compound 46

Peking University Mass Spectrometry Sample Analysis Report

Analysis Info

Analysis Name 14090775\_20140922\_000003.d  
 Sample HX1-88  
 Comment ESI Positive

Acquisition Date 9/22/2014 10:42:48 AM  
 Instrument Bruker Apex IV FTMS  
 Operator Peking University

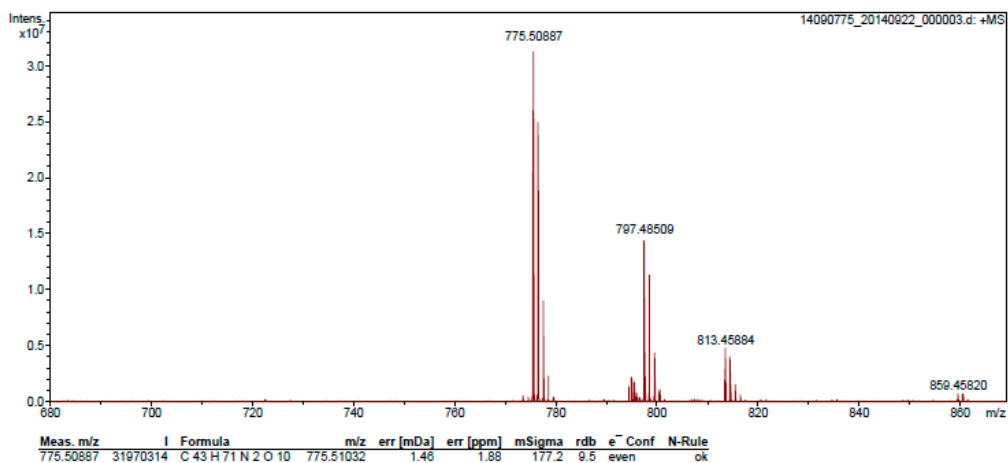

Supplement: s1 [file s1]
